# Supplementary material for: A Nrf2-OSGIN1&2-HSP70 axis mediates cigarette smoke-induced endothelial detachment: implications for plaque erosion
Source: PubMed Central journal article supplement (PMC10405570; doi:10.1093/cvr/cvad022), 2023-02-18
Supplement: cvad022_supplementary_data.pdf [file cvad022_supplementary_data.pdf]

## A pivotal role for Nrf2 in smoking induced endothelial detachment– implications for endothelial erosion of stenotic plaques

**Authors:** Sandro Satta<sup>1</sup>, Robert Beal<sup>1</sup>, Rhys Smith<sup>1</sup>, Xing Luo<sup>2</sup>, Glenn R Ferris<sup>1</sup>, Alex Langford-Smith<sup>1</sup>, Jack Teasdale<sup>3</sup>, Tom Tanjeko Ajime<sup>4</sup>, Jef Serré<sup>4</sup>, Georgina Hazell<sup>3</sup>, Graciela Sala Newby<sup>3</sup>, Jason L Johnson<sup>3</sup>, Svitlana Kurinna<sup>5</sup>, Martin J Humphries<sup>5</sup>, Ghislaine Gayan-Ramirez<sup>4</sup>, Peter Libby<sup>6</sup>, Hans Degens<sup>1,8</sup>, Bo Yu<sup>2</sup>, Thomas Johnson<sup>7</sup>, Yvonne Alexander<sup>1</sup>, Haibo Jia<sup>2</sup>, Andrew C Newby<sup>3</sup>, Stephen J White<sup>1\*</sup>

### Supplementary Information

#### Methods

##### Tissue culture:

**Shear stress models** - Confluent monolayers of HCAEC were initially cultured for 24 hours under oscillatory ( $0\pm 5$  dynes/cm<sup>2</sup>,  $\pm 0.5$ Pa, 1 Hz OSS), normal laminar (15 dynes/cm<sup>2</sup>, 1.5Pa LSS), or elevated laminar shear stress (75 dynes/cm<sup>2</sup>, 7.5Pa ESS) to allow cells to adapt to their shear environment using a parallel plate flow apparatus. Three treatments were administered, 16 hours apart (Figure 1A) of vehicle (control), TNF $\alpha$  (5ng/ml), CSE (10%), or both (T+C). HCAECs were cultured for a total of 72 hours, with 48 hours of treatment.

In addition, the orbital shaker model was also used<sup>1</sup>, as this allows analysis of cells that have detached. For this system, cells were seeded on day 1 into 6 well plates, transduced with virus day 2 at a total pfu/cell of 400. Virus was removed on day 3 and the cells exposed to shear stress for 48 hours prior to analysis. 3 ml of MV2 fresh media was added and the plates were placed on an orbital shaker at 210 rpm for 48 hours to generate a defined shear stress pattern across the well, with low shear stress of approximately 4 dyn/cm<sup>2</sup> in the centre and high shear stress of approximately 13 dyn/cm<sup>2</sup> in the periphery. Compounds aimed at modulating cell adhesion (Table S1) were added to the HCAECs on commencement of exposure to shear stress.

| Compounds   | Work concentration | Brand | Dissolved in |
|-------------|--------------------|-------|--------------|
| Chloroquine | 150 or 300 $\mu$ M | Sigma | MV2 media    |
| Bafilomycin | 50nM or 100nM      | Sigma | DMSO         |
| Metformin   | 100 $\mu$ M        | Sigma | MV2 media    |
| VER-155008  | 15 $\mu$ M         | Sigma | DMSO         |

Table S1 Chemical compounds added during orbital shaker experiment

#### ELISA

The level of GDF15, HSP70, S100P and IL-8 in patients' serum with OCT-defined plaque rupture or OCT-defined plaque erosion was measured by ELISA kit according to the manufacturer's instructions (CUSABIO, China).

#### Construction of Adenoviral vectors

OSGIN1 and OSGIN2 were cloned into pCpG-free MCS (Invivogen). The coding regions were amplified by PCR using primers (OSGIN1: F-CCAAGATCTCCACCCACCATGAGCTCCTCCAGAAAGGAC; R-TGGGCTAGCGTTAGGGTGGCTTCCTGGTCTCCTCC. OSGIN2: F-GTGAGATCTAGAGGCGAAAAGTTAACACCATGCCATTAGTTGAAGAACTTC; R-GTAAGCTAGCTTTAAGCTATCCCATCTCCTCC) using KOD proofreading DNA-polymerase, introducing a 5' BglIII site and 3' NheI site. Once inserted into the respective sites in pC-G-free MCS, the whole expression

cassette was shuttled into pDC511 (Microbix Biosystems, Canada) for adenoviral vector production as previously described<sup>2</sup>.

### Construction of lentiviral vectors

Overexpression of KEAP1 was facilitated using lenti-KEAP1. KEAP1 was amplified by PCR using KOD proofreading polymerase and primers SW787F 5' – GCGGATCCTCTAGAACACCATGCAGCCAGATCCC which created BamHI and XbaI sites, and SW788R 5' CCCAGTCGACAAGCTAGCCTCAACAGGTACAGTTCTGCTG, which created NheI and SalI sites post stop codon. This fragment was TA cloned into pGEMTeasy and shuttled into lentiviral overexpression vector 326 under the control of the CMV promoter, replacing GFP (326 expressing GFP was used as a control). shRNAs for OSGIN1 & 2 were designed using splash RNA (<http://splashrna.mskcc.org/>)<sup>3</sup> and the top 3 designs were used to replace the first 3 miRs in the miR17 cluster with appropriate mismatches to ensure incorporation of target strand into RISC as described by<sup>4</sup>. Constructs were synthesised by Eurofins and cloned into plentilox3.1 under the control of the U6 promoter. An empty vector (no-shRNA) was used as a control.

### Cytotoxicity, viability and apoptosis analysis

Apotox-Glo triplex assay (Promega, Madison, USA) was performed in the HCAECs, according to manufacturer's instructions, and 40 hours after AdOSGIN1 and AdOSGIN2 infection. To this end, cells were plated into 96-well plates at a density of  $5 \times 10^4$  cells per well. Results were normalized to DMSO treated control cells. Experiments were performed five times with eight replicates per condition. In addition, Caspase-3 activity was measured using a caspase-3 activity assay kit (Promokine kit), fluorescence was measured at  $\lambda_{max} = 505$  nm after 3 h of incubation with the substrate and normalized by the protein content of each sample. Each treatment had five technical replicates and performed in triplicate.

### Cell cycle analysis in HCAECs

Cell cycle analysis was performed by flow cytometry on ethanol-fixed cells stained with 25  $\mu$ g/ml propidium iodide (PI). Analyses were performed using a FACScan flow cytometer (FACS Calibur, BD Transduction Laboratories) using Modfit software. BrdU analysis was performed as described<sup>2</sup>.

### Western blotting of HCAEC lysates

HCAECs were lysed in SDS lysis buffer [2% SDS; 50 mM Tris pH 6.8; 10% glycerol]. Protein concentration in the lysate was quantified using bicinchoninic acid-assay (BCA, Pierce BCA Protein Assay). Between 12 and 20  $\mu$ g of protein were loaded per lane on denaturing SDS–polyacrylamide gels and blotted onto Nitrocellulose or PVDF membranes. See Table S2 for further information. All experiments were conducted in triplicate.

|                                          | Primary ab                            | Blocking Solution | Secondary ab                                                                                                  |
|------------------------------------------|---------------------------------------|-------------------|---------------------------------------------------------------------------------------------------------------|
| OSGIN1<br>(Biorbyt orb100666)            | Rabbit-antiOSGIN1 (1:1000)<br>O/N 4°C | 1% BSA            | Monoclonal Secondary HRP-anti rabbit (1:1000-1h) in TBSTween                                                  |
| OSGIN2<br>(Biorbyt orb185683)            | Rabbit-antiOSGIN2 (1:500)<br>O/N 4°C  | 1% BSA            | Monoclonal Secondary HRP-anti rabbit (1:1000-1h) in TBSTween                                                  |
| PARP cleavage<br>(Cell Signaling D64E10) | Rabbit anti-PARP (1:1000)<br>O/N 4°C  | 0,5% BSA          | Monoclonal Secondary HRP-anti rabbit (1:2000-1h) in TBSTween                                                  |
| SQSTM1/p62<br>(Abcam ab56416)            | Mouse anti-p62 (1:1000)<br>O/N 4°C    | 3% Milk           | Monoclonal Secondary HRP-anti mouse (1:5000-1h) in TBSTween                                                   |
| HSP70<br>(Abcam ab45133)                 | Rabbit anti-HSP70 (1:1000)<br>O/N 4°C | 5% Milk           | Monoclonal Secondary HRP-anti rabbit (1:5000-1h) in TBSTween                                                  |
| LAMP1<br>(Abcam ab24170)                 | Rabbit anti-LAMP1 (1:1000)<br>O/N 4°C | 1,5% Milk         | Polyclonal Secondary HRP-anti rabbit (1:500-1h) + Monoclonal Secondary HRP-anti rabbit (1:500-1h) in TBSTween |

Table S2. Primary Antibodies, dilutions and methodology used in Western Blotting

### Immunocytochemistry of HCAEC

HCAECs were exposed to AdOSGIN1 and AdOSGIN2 infection before being fixed in cold 4% paraformaldehyde for 10 minutes. Cells were permeabilised with 0.1% triton, blocked in 20% goat serum and probed with rabbit anti-OSGIN1 (1:100, Biorbyt) and rabbit anti-OSGIN2 (1:75, Biorbyt), and rabbit anti-VE-Cadherin (Cell Signaling) followed by goat anti rabbit Alexa Fluor 488 (1/200, Invitrogen). Further staining was carried out with mouse anti-Vinculin (1/400, Sigma), mouse anti- $\beta$ -catenin (1/200, BD Transduction Laboratories), mouse -mab137 (1/100, Sigma) followed by goat anti mouse Alexa Fluor 594 (1/200, Invitrogen). In combination with the previous staining, anti-Phalloidin (1/250, Sigma), and anti-Tubulin (1/1000, Abcam) were added (antibody titration Table S3).

| Antibody         | Type                       | Dilution | Company                               |
|------------------|----------------------------|----------|---------------------------------------|
| OSGIN1           | Rabbit                     | 1:100    | (Biorbyt orb100666)                   |
| OSGIN2           | Rabbit                     | 1:75     | (Biorbyt orb185683)                   |
| VE-Cadherin      | Rabbit                     | 1:400    | (Cell Signalling D87F2)               |
| $\beta$ -Catenin | Mouse                      | 1:100    | (BD Transduction Laboratories 610153) |
| Vinculin         | Mouse                      | 1:400    | (Sigma V4505)                         |
| Mab113           | Mouse                      | 1:100    | (Abcam ab92824)                       |
| Tubulin          | Already conjugated (Green) | 1:1000   | (Abcam ab64503)                       |
| Phalloidin       | Already conjugated (Red)   | 1:250    | (Sigma P1951)                         |
| HSP70            | Rabbit                     | 1:400    | (Abcam ab45133)                       |
| LAMP1            | Rabbit                     | 1:100    | (Abcam ab24170)                       |
| SQSTM1/p62       | mouse                      | 1:200    | (Abcam ab56416)                       |

### Secondary Antibody description

|                |                      |       |            |
|----------------|----------------------|-------|------------|
| Alexa fluor488 | Anti mouse or rabbit | 1:200 | Invitrogen |
| Alexa fluor647 | Anti mouse or rabbit | 1:200 | Invitrogen |

Table S3. Primary Antibodies used in Immunocytochemical analysis

### Senescent-associated $\beta$ -galactosidase staining

Paraformaldehyde fixed HCAECs were rinsed with ice-cold PBS pH 6.0 and submerged in senescent-associated  $\beta$ -galactosidase (SA- $\beta$ -Gal) staining solution [1 mg/ml 5-bromo-4-chloro-3-indolyl  $\beta$ -d-galactopyranoside (X-gal), 5 mM  $K_4Fe(CN)_6$ , 5 mM  $K_3Fe(CN)_6$ , 150 mM  $NaCl_2$  and 2 mM  $MgCl_2$  titrated with 1M  $NaH_2PO_4$  to pH 6.0] and incubated overnight at 37°C. After staining, HCAECs were rinsed with ice-cold PBS pH 6.0, and micrographs were taken with a Leica M165 FC stereomicroscope.

### RNA extraction and reverse transcriptase-polymerase chain reaction (RT-PCR)

Total RNA was extracted from HCAECs using the RNeasy Mini Kit (Norgen) according to the manufacturer's protocol. 250ng RNA were reverse transcribed into cDNA with random primer by reverse transcriptase (RT) (Qiagen). cDNA (relative 1ng RNA) was amplified by standard PCR with Taq DNA polymerase (Sensifast, SybrGreen, LOW-ROX Kit, Biorbyt) and primers. Primers were designed using NCBI software. For each gene, SYBR Green was used in place of a labelled probe (primers sequences Table S4). GAPDH RNA was used as the

internal control for each gene and the target gene was amplified in duplex in PCR mixtures (10 µl final volume) containing 4 µl Sybr® Green PCR Master Mix, cDNA template 1 µl, optimised primers 2 µl and 3 µl of H<sub>2</sub>O. PCR thermal cycle parameters were: 5 minutes 95°C 30 seconds between at 65°C to 70°C depending on primers optimisation, 30 seconds at 72°C 40 cycles of 95°C for 15 seconds and 60°C for 1 minute. Reactions were performed, and fluorescence was monitored in an Applied Biosystem detector (Applied Biosystem). Relative mRNA expression level was defined as the ratio of target gene expression level to GAPDH mRNA expression. Primers sequences can be found in Table S4.

|                |                |                                                      |
|----------------|----------------|------------------------------------------------------|
| p21            | (SW878F/879R)  | F CTCAGGGTCGAAAACGGCGG<br>R GTGGGCGGATTAGGGCTTCCT    |
| p16            | (SW926F/927R)  | F CGAGCTCGGCCCTGGAG<br>R TCGGGCGCTGCCCATCAT          |
| HSPA1A         | (SW355F/356R)  | F TGAGGAGCTGCTGCGACAGT<br>R GGCTGGAAACGGAACACTGG     |
| HSPA1B         | (SW357F/358R)  | F TGTTGAGTTTCCGGCGTTCC<br>R AACACCCCCACGCAGGAGTA     |
| BAG3           | (SW966F/967R ) | F GCGGGGCATGCCAGAAACCA<br>R CTGGCCGGGTAACGTTCTGCT    |
| ATG7           | (SW894F/895R)  | F GGACTGGCCGTGATTGCAGGA<br>R ATCCGATCGTCACTGCTGCTGG  |
| ATG9A          | (SW938F/939R)  | F AGAGGCGCTACGGTGGCATC<br>R GCCTTGATGCCGACTGCCCA     |
| MAP1LC3B       | (SW934F/935R)  | F CGCCCAGATCCCTGCACCAT<br>R AGCATTGAGCTGTAAGCGCCTTCT |
| SQSTM1/p62     | (SW936F/937R)  | F GGACGGGGACTTGGTTGCCTT<br>R CGGGTTCTACCACAGGCC      |
| GABARAPL1/ATG8 | (SW940F/941R)  | F CGGACAGGGTCCCCGTGATTG<br>R AGCACTGGTGGGAGGGATGGT   |
| GAPDH          | (SW180F/181R)  | F CGGATTTGGTCGTATTGGGCG<br>R GCCTTCTCCATGGTGGTGAAGAC |

Table S4. Primer sequences used for real-time PCR

### RNASeq data analysis on HCAEC with OSGIN1&2 overexpression

Strand-specific RNA-seq libraries were prepared using the Illumina workflow with the TruSeq® Stranded mRNA Sample Preparation Kit. Paired-end reads of 65bp were generated from each sample on the Illumina platform of HiSeq4000. The fastq files generated were analysed with FastQC<sup>5</sup>, any low quality reads and contaminated barcodes were trimmed with Trimmomatic<sup>6</sup>. All libraries were aligned to the hg38 assembly of human genome using STAR-2.5.3a<sup>7</sup> and only the unique alignments were reported for each read. The mapped reads were also counted with STAR at gene level against gencode.v25.annotation.gtf. R was used for all the statistical analysis of data<sup>8</sup>. The counts data were normalized and donor effect removed using the R package RUVSeq<sup>9</sup>. Differentially expressed genes were detected with the R package of DESeq2<sup>10</sup> between groups of experimental data sets. Cluster analysis was carried out on the DE genes identified with DESeq2 using a padj cut off of 0.05 with gplots<sup>11</sup>. The predicted upstream regulators and altered canonical pathways were generated through the use of IPA (QIAGEN Inc., <https://www.qiagenbioinformatics.com/products/ingenuity-pathway-analysis>)<sup>12</sup>. The cluster analysis was carried out on the differentially expressed genes identified with DESeq2 using a p-adjusted cut off of 0.05, absolute log<sub>2</sub> fold change cut off of 0.5, and base Mean cut off of 50. The Pearson distance was clustered with the hclust function and plotted with an R package of gplots.

### Patient study population and blood samples

Patients presenting with ST-segment elevation myocardial infarction (STEMI) underwent primary percutaneous coronary intervention (PCI) at the Second Affiliated Hospital of Harbin Medical University were prospectively enrolled in this study. The diagnosis of STEMI was made according to the following criteria: detection of cardiac troponin values with at least one value above the upper reference, typical symptoms of acute myocardial ischemia and new ischemic electrocardiogram changes. Thrombus aspiration was performed in all patients before optical coherence tomography (OCT) examination. OCT imaging of culprit lesion were performed after antegrade flow restoration without any intervention. Patients were divided into plaque erosion and plaque rupture group according to OCT image of culprit lesion. The plaque rupture and plaque erosion were defined by OCT based on our previously established definition<sup>13</sup>. OCT-erosion was identified by the presence of attached thrombus overlying an intact and visualized plaque, while OCT-rupture was identified by disruption of fibrous cap and cavity formation in the plaque. The blood samples around the culprit lesion were collected from intracoronary aspirates during the primary PCI. The serum was separated and stored at -80°C immediately. Written informed consent was obtained from all patients. This study was approved by the institutional research ethics committee of the Second Affiliated Hospital of Harbin Medical University and conforms to the principles outlined in the Declaration of Helsinki.

|                                       | PR(n=46)     | PE(n=34)      | <i>p</i> value |
|---------------------------------------|--------------|---------------|----------------|
| <b>Demographic data</b>               |              |               |                |
| Female gender, n (%)                  | 14(30.4)     | 7(20.6)       | 0.161          |
| Age, year                             | 59.7±10.9    | 51.1±8.1      | <0.001         |
| Smoking, n(%)                         | 21(45.7)     | 20(58.8)      | 0.122          |
| Hypertension, n(%)                    | 17(36.9)     | 15(44.1)      | 0.259          |
| Diabetes, n(%)                        | 9(19.6)      | 4(11.8)       | 0.175          |
| Hyperlipemia, n(%)                    | 10(21.7)     | 8(23.5)       | 0.425          |
| Stroke, n(%)                          | 8(17.4)      | 4(12.1)       | 0.243          |
| BMI (kg/m <sup>2</sup> )              | 25.1±3.3     | 24.8±2.8      | 0.384          |
| <b>Laboratory data</b>                |              |               |                |
| TC (mmol/L)                           | 5.0±1.2      | 4.5±1.3       | 0.060          |
| TG (mmol/L)                           | 1.4(0.8-1.8) | 1.2(1.0-1.9)  | 0.240          |
| LDL (mmol/L)                          | 3.2±1.0      | 2.9±0.8       | 0.112          |
| HDL (mmol/L)                          | 1.4±0.3      | 1.4±0.4       | 0.474          |
| White blood cell (10 <sup>9</sup> /L) | 10.8±3.6     | 12.2±4.1      | 0.061          |
| C-reactive protein (mg/L)             | 4.0(1.6-7.7) | 5.0(2.3-10.1) | 0.218          |

Baseline characteristics of ACS patients analysed in this study that experienced either plaque rupture (PR) or plaque erosion (PE)

### Immunofluorescence on Mouse Aortas

8µm frozen sections of aortas from mice exposed to air (control mice) or cigarette smoke for 3 months (as described<sup>14</sup>) were fixed in ice cold acetone before immunofluorescence was performed using the antibodies described above. The mouse tissue used in this manuscript was not generated for this study, but was surplus to the described study<sup>14</sup>, and therefore utilised in this study in line with 3Rs principles. All experimental procedures were carried out in accordance with relevant guidelines and regulations and approved by the Ethical Committee of Animal Experiments of the KU Leuven.

## SUPPLEMENTARY DATA

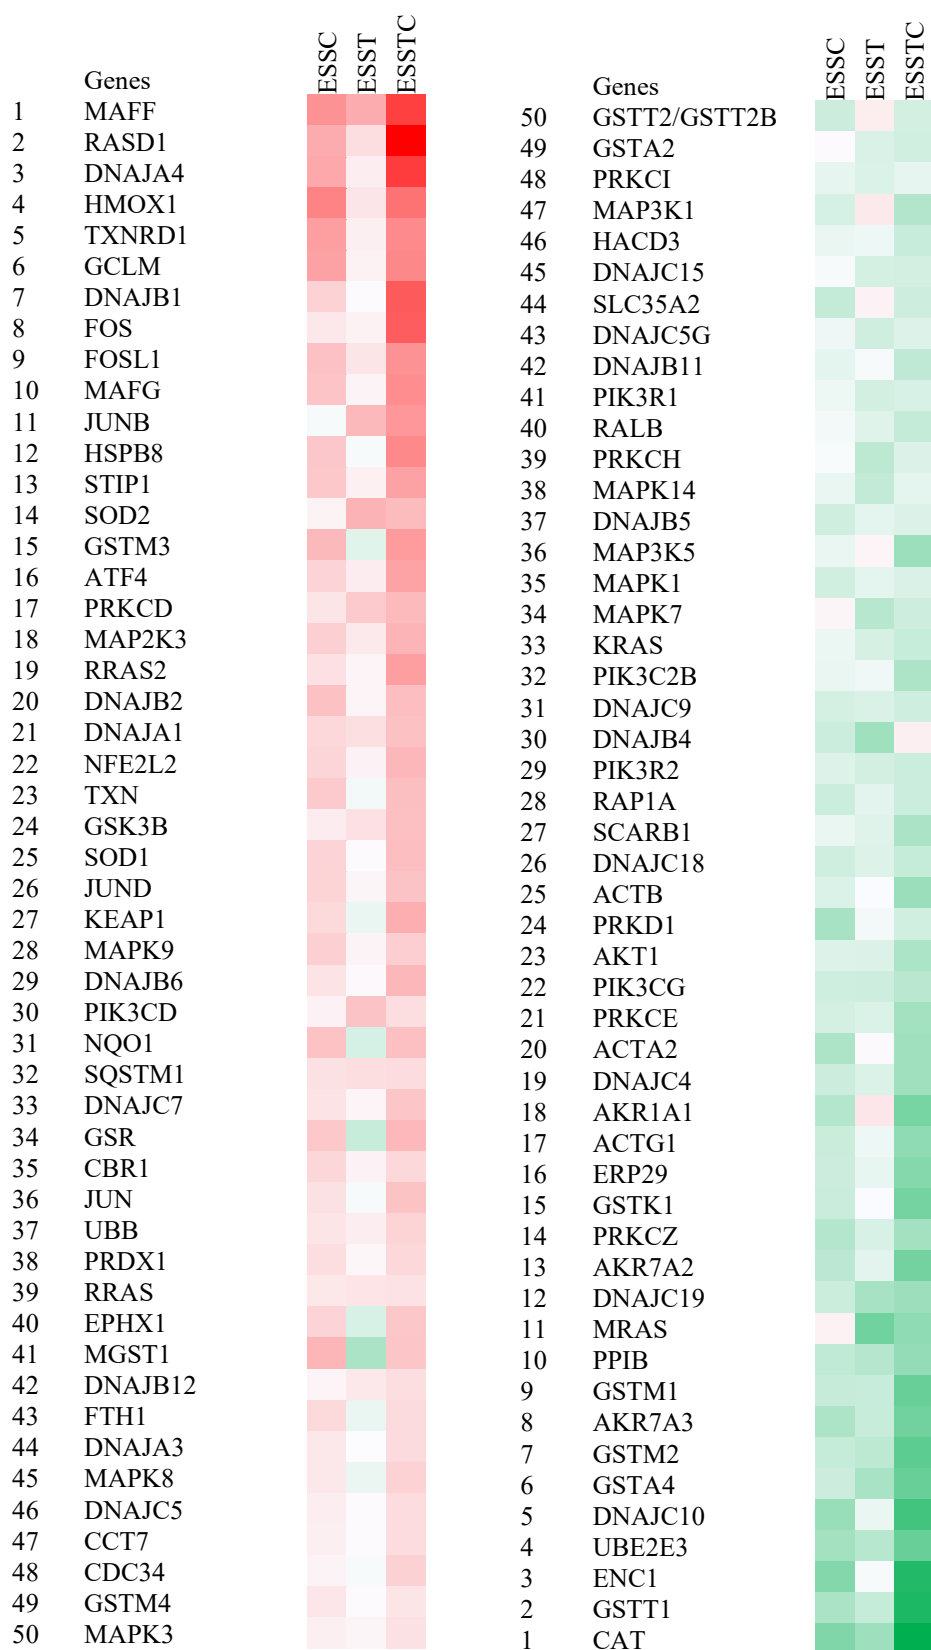

Figure S1. Top 50 genes upregulated and downregulated compared to elevated shear stress (ESS) control.

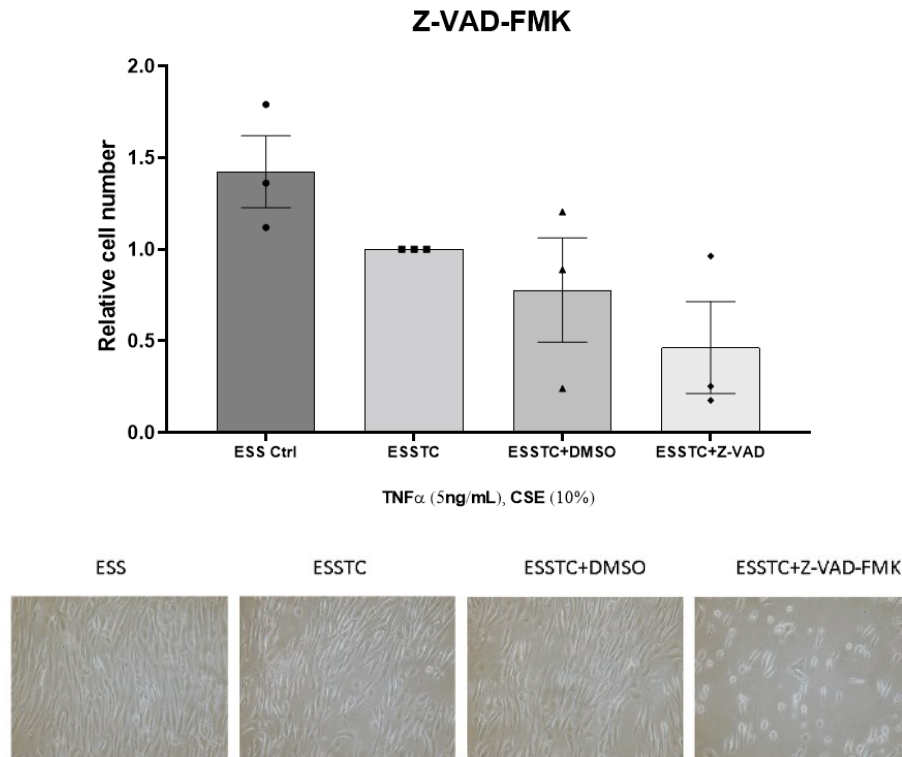

Figure S2: Cell Adhesion of HCAECs exposed to a combination of elevated shear stress,  $TNF\alpha$  and CSE together (ESSTC), with additional Z-VAD-FMK treatment ( $20\mu M$ ), vs untreated and DMSO controls at ESS for 72 hours. Cell number was quantified using picogreen assay, expressed as mean fold change against control  $\pm$  S.E.  $n=3$ .

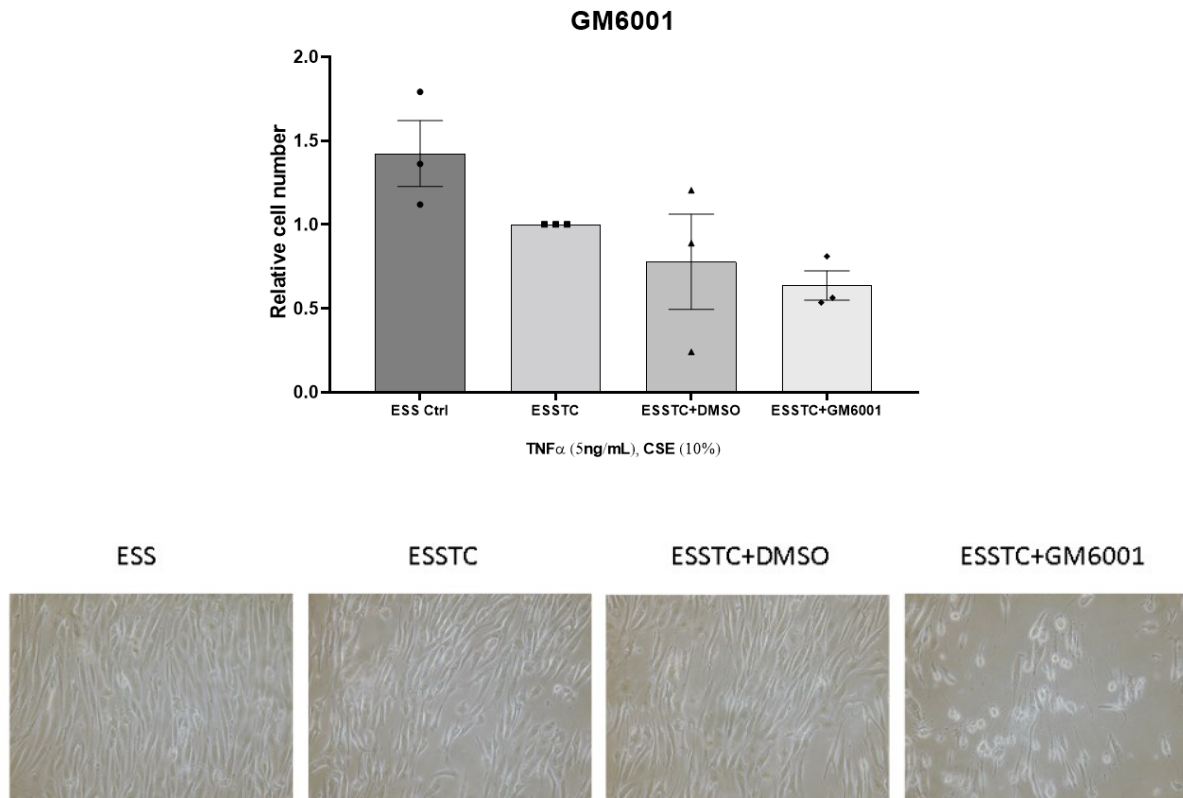

Figure S3: Cell number of HCAECs exposed to a combination of  $TNF\alpha$  and CSE together (T+C), with additional GM6001 treatment ( $10\mu M$ ), vs untreated and DMSO controls at ESS for 72 hours. Cell number was quantified using picogreen assay, expressed as mean fold change against control  $\pm$  S.E.  $n=3$ .



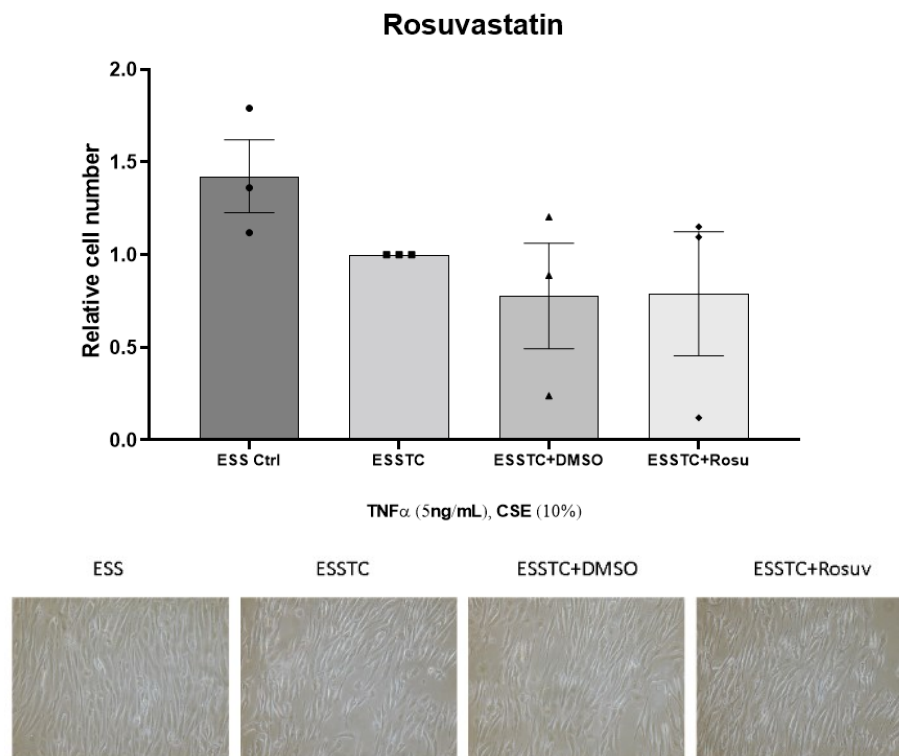

Figure S4: Cell Adhesion of HCAECs exposed to a combination of elevated shear stress, TNF $\alpha$  and CSE together (ESSTC), with additional 3 $\mu$ M Rosuvastatin treatment, vs untreated and DMSO controls at ESS for 72 hours. Cell number was quantified using picogreen assay, expressed as mean fold change against ESSTC  $\pm$  S.E. n=3.

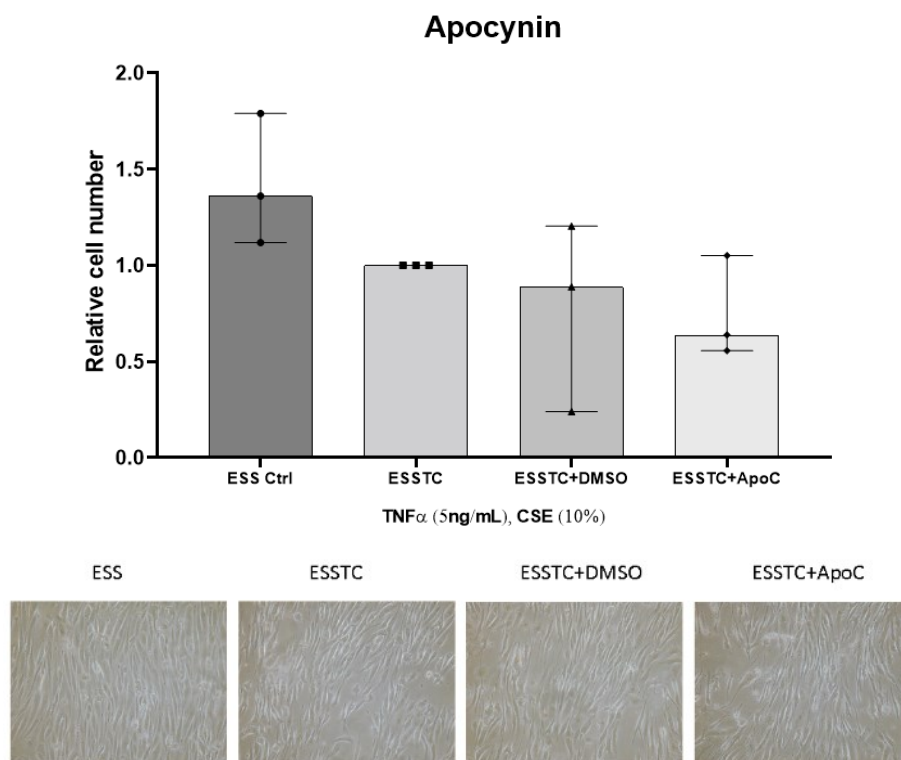

Figure S5: Cell Adhesion of HCAECs exposed to a combination of elevated shear stress, TNF $\alpha$  and CSE together (ESSTC), with additional 200 $\mu$ M Apocynin treatment, vs untreated and DMSO controls at ESS for 72 hours. Cell number was quantified using picogreen assay, expressed as mean fold change against control  $\pm$  S.E. n=3.



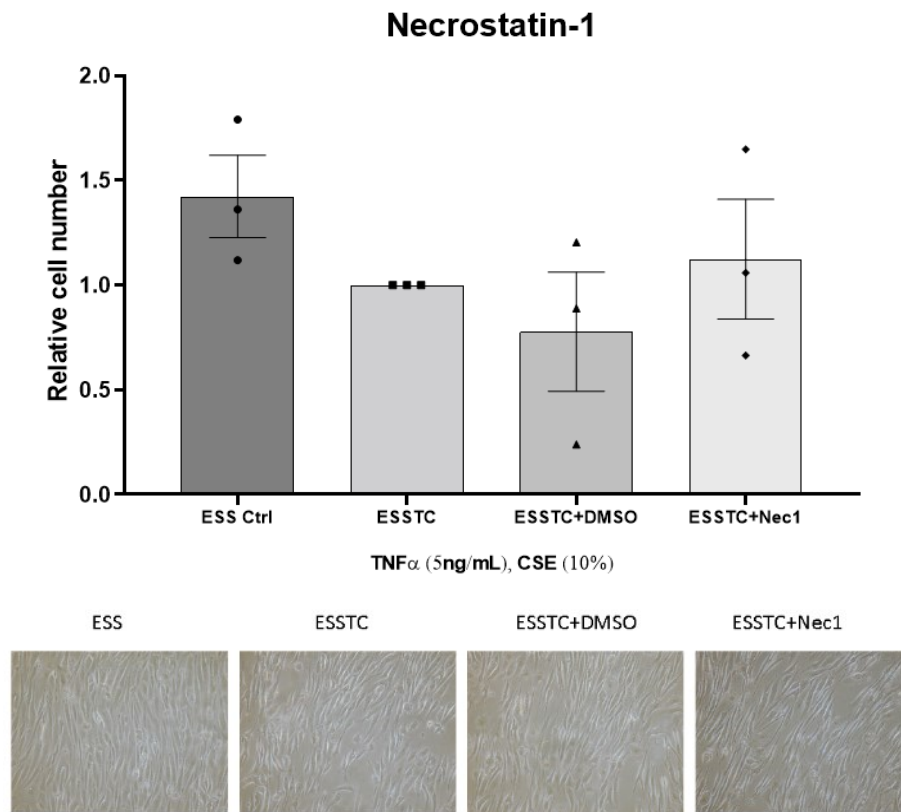

Figure S6: Cell Adhesion of HCAECs exposed to a combination of elevated shear stress, TNF $\alpha$  and CSE together (ESSTC), with additional Necrostatin-1 treatment (10 $\mu$ M), vs untreated and DMSO controls at ESS for 72 hours. Cell number was quantified using picogreen assay, expressed as mean fold change against control  $\pm$  S.E. n=3.

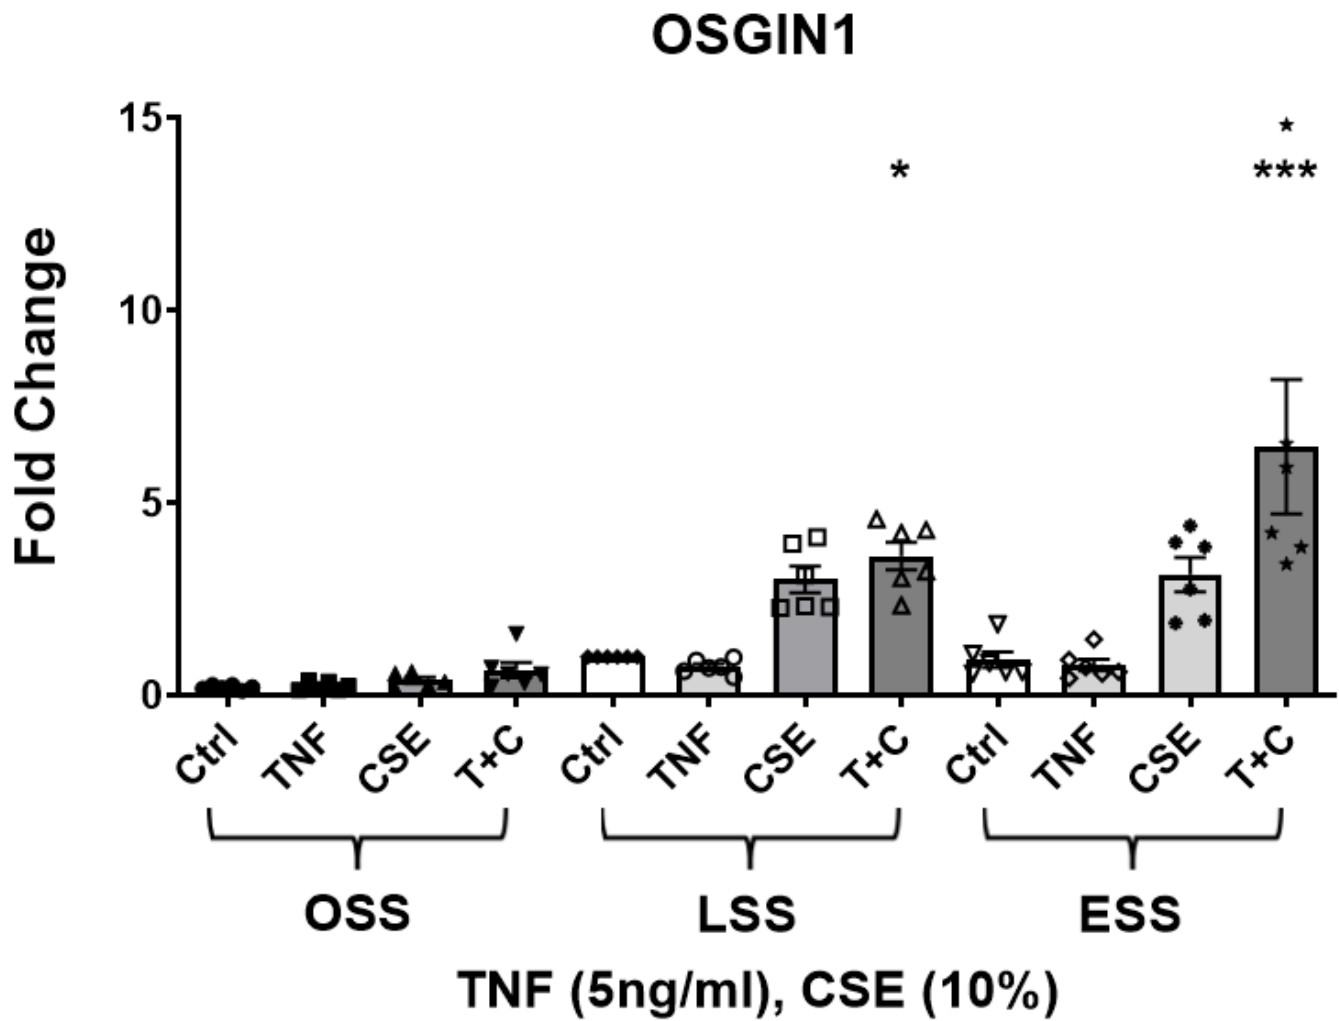

Figure S7. OSGIN1 mRNA expression in HCAECs cultured under OSS, LSS or ESS, with TNF $\alpha$  (5ng/ml) or CSE (10%) or both (\*P=0.05, \*\*P<0.01, \*\*\*P<0.001 v LSS CTRL, mean and SEM n=6, two-way ANOVA). Reproduced from reference<sup>17</sup>, under CCL4.0

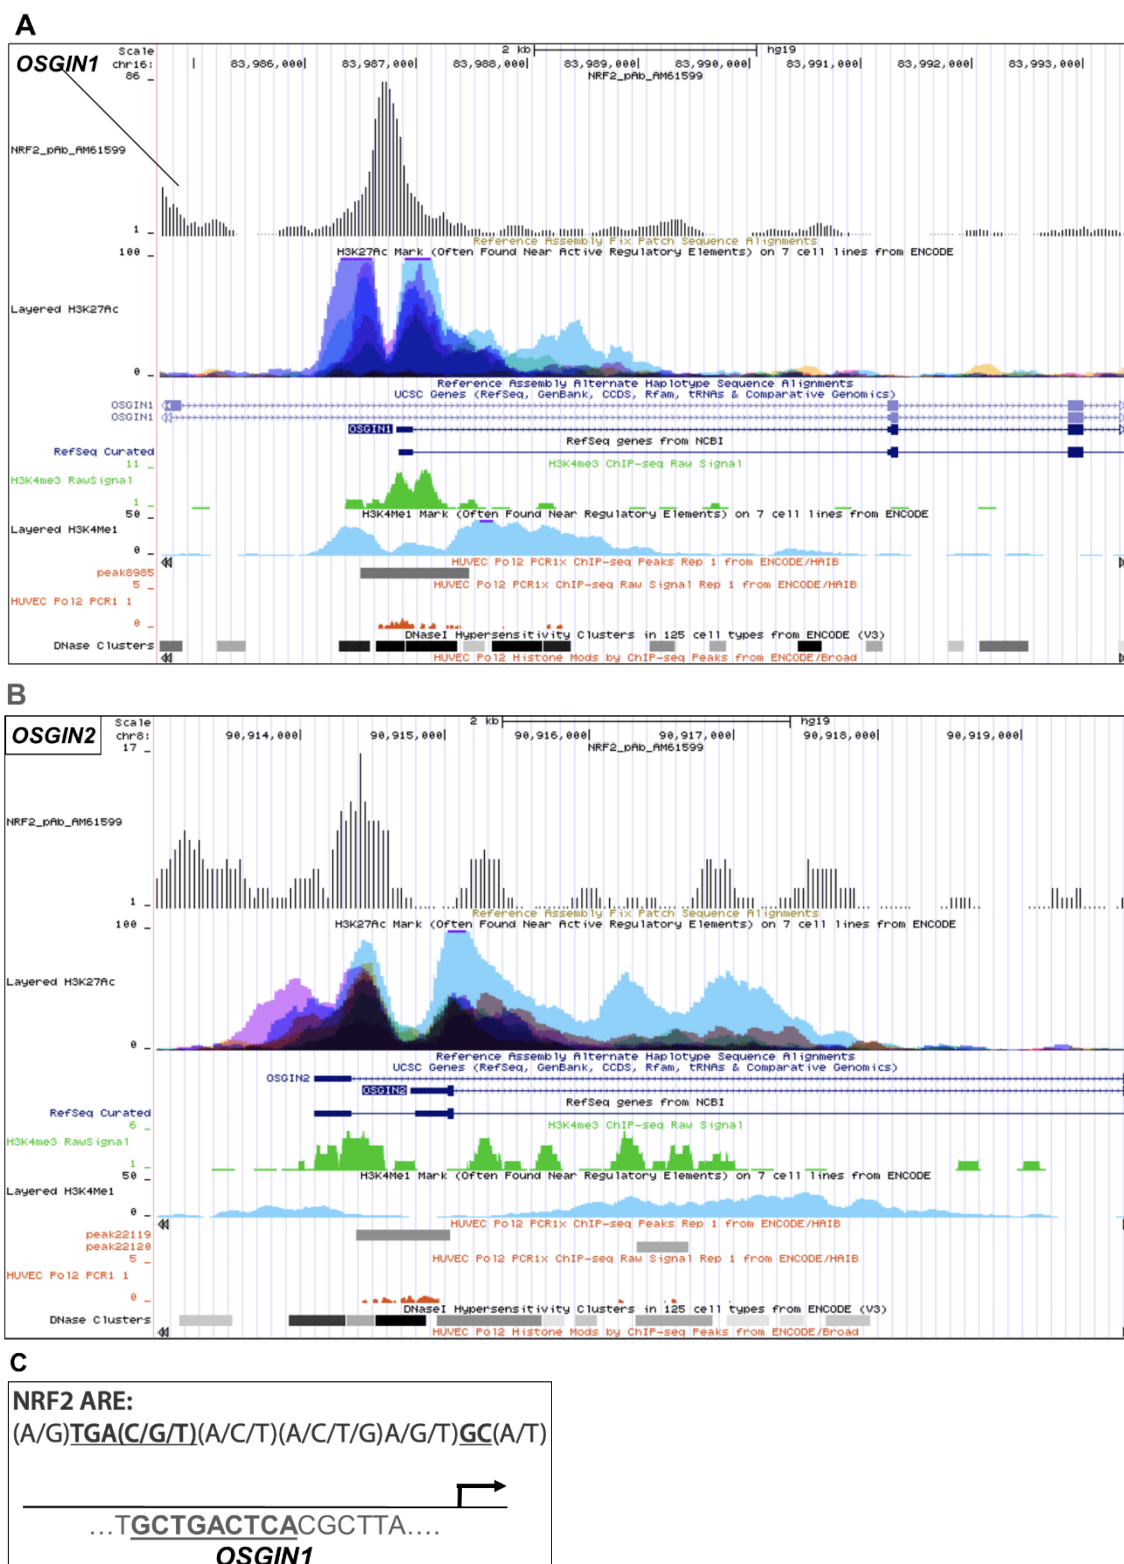

Figure S7. NRF2 binds and activates OSGIN1 promoter (A, B) UCSC genome browser tracks displaying ChIP-seq reads for NRF2 (grey), layered H3K27Ac (shades of blue), H3K4me3 (green), H3K4me1 (light blue), and POLII (grey bars and orange peaks). DNase hypersensitive clusters are in black. Please note higher scale of NRF2 and H3K4me3 at the promoter of OSGIN1, together with the higher levels of H3K4me1 on OSGIN1 compared to OSGIN2. While POLII is bound to promoters of both genes, difference in H3K4 methylation suggests that OSGIN1 is actively transcribed and OSGIN2 is poised for transcription. We found an NRF2 binding site antioxidant response elements (ARE) under the NRF2 binding peak located at 130bp upstream of the transcription start site (TSS) of OSGIN1 (C) and predicted four AREs 4kb upstream of the OSGIN2 TSS. This supports our previously published findings<sup>15</sup>.

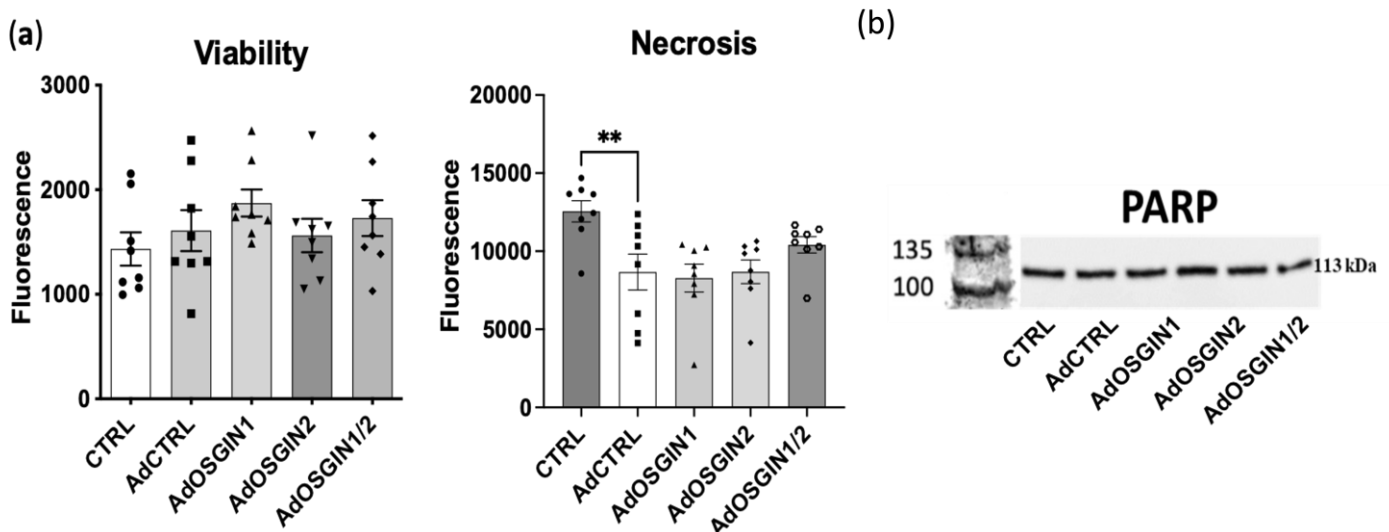

Figure S8 **a)** Cell viability assay for HCAECs. The cell viability was measured post transfection at 24h (adenovirus overexpression of OSGIN1, OSGIN2 and both together) and did not cause a significant decrease in cell viability. Overexpression of OSGIN1, OSGIN2 and both together did not cause a significant increase or decrease in necrosis. Viability and Necrosis were measured using promega Apotox Glo assay kit. **c)** Total Parp antibody in western blotting showed no parp cleavage by caspase-3. No second band was reported in any sample suggesting no apoptosis activity.

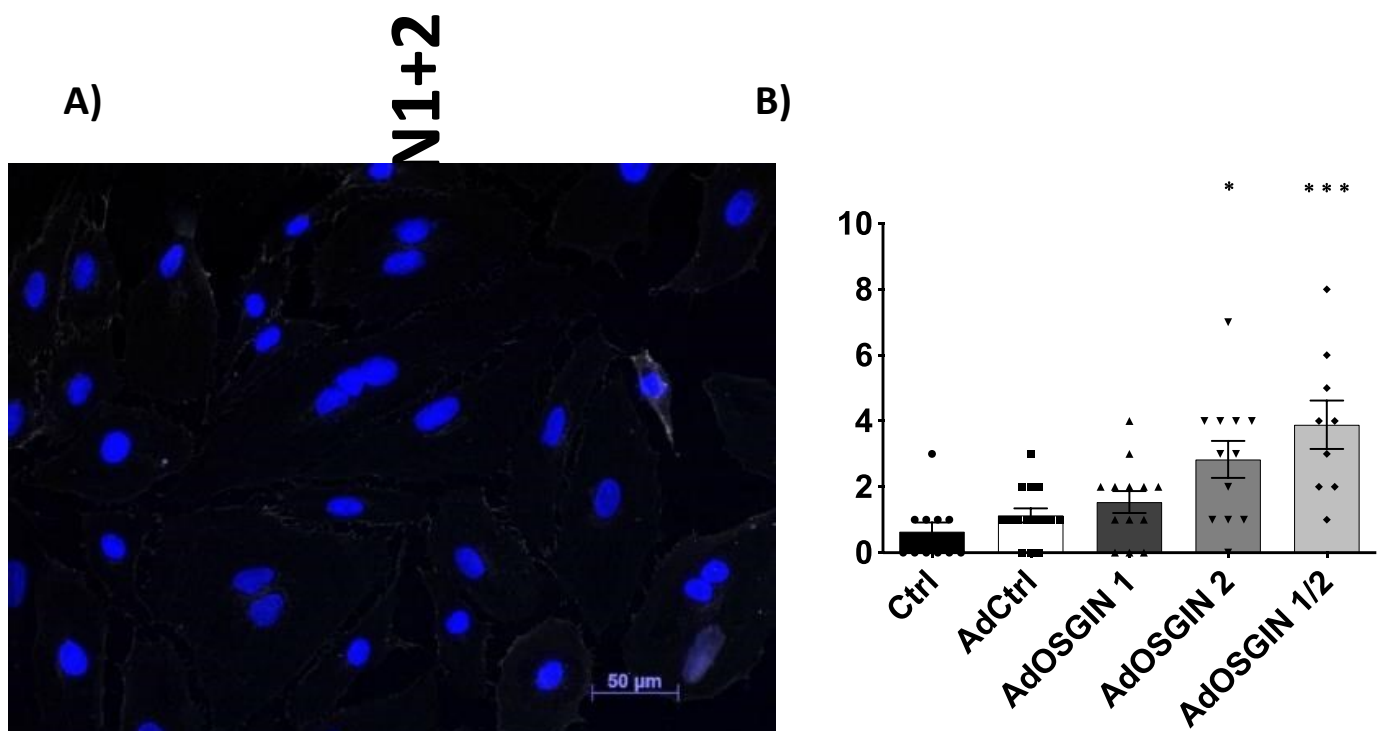

Figure S9. A) AdOSGIN1/2 condition resulted in numerous multinucleated cells. B) Number of multi-nucleated cells were counted and compared against AdCtrl. AdOSGIN2 and AdOSGIN1/2 showed up to four times more multi nucleated cells \* $P < 0.05$ , and \*\*\* $P < 0.001$ .

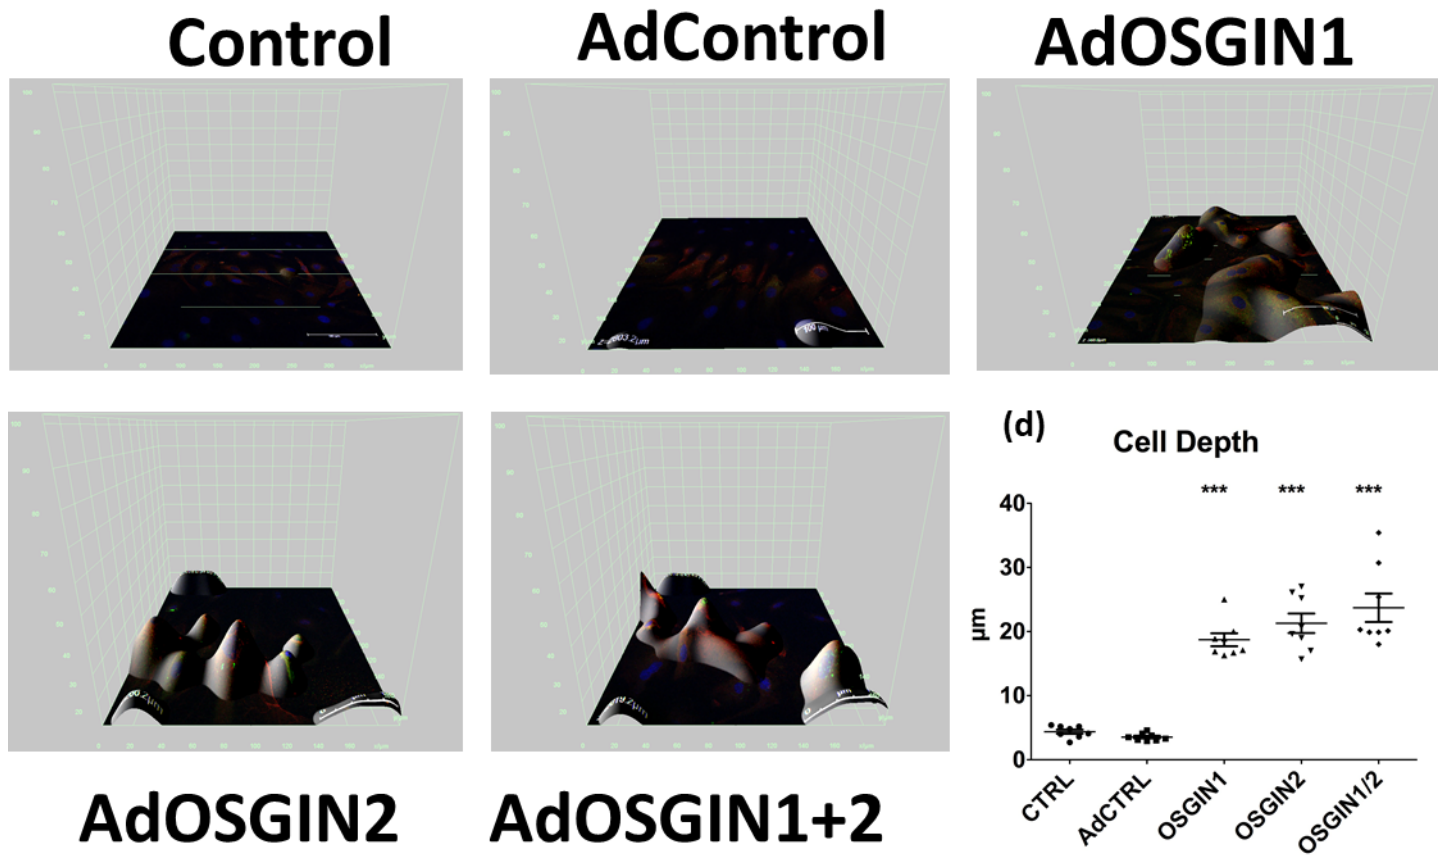

Figure S10: 3D cell model was created using Leica software confocal image stack in combination with Image j: image to stack from 50 layers of confocal images. Cell depth was measured with an increment of cell height up to 25 $\mu\text{m}$  (n=3; P<0.001).



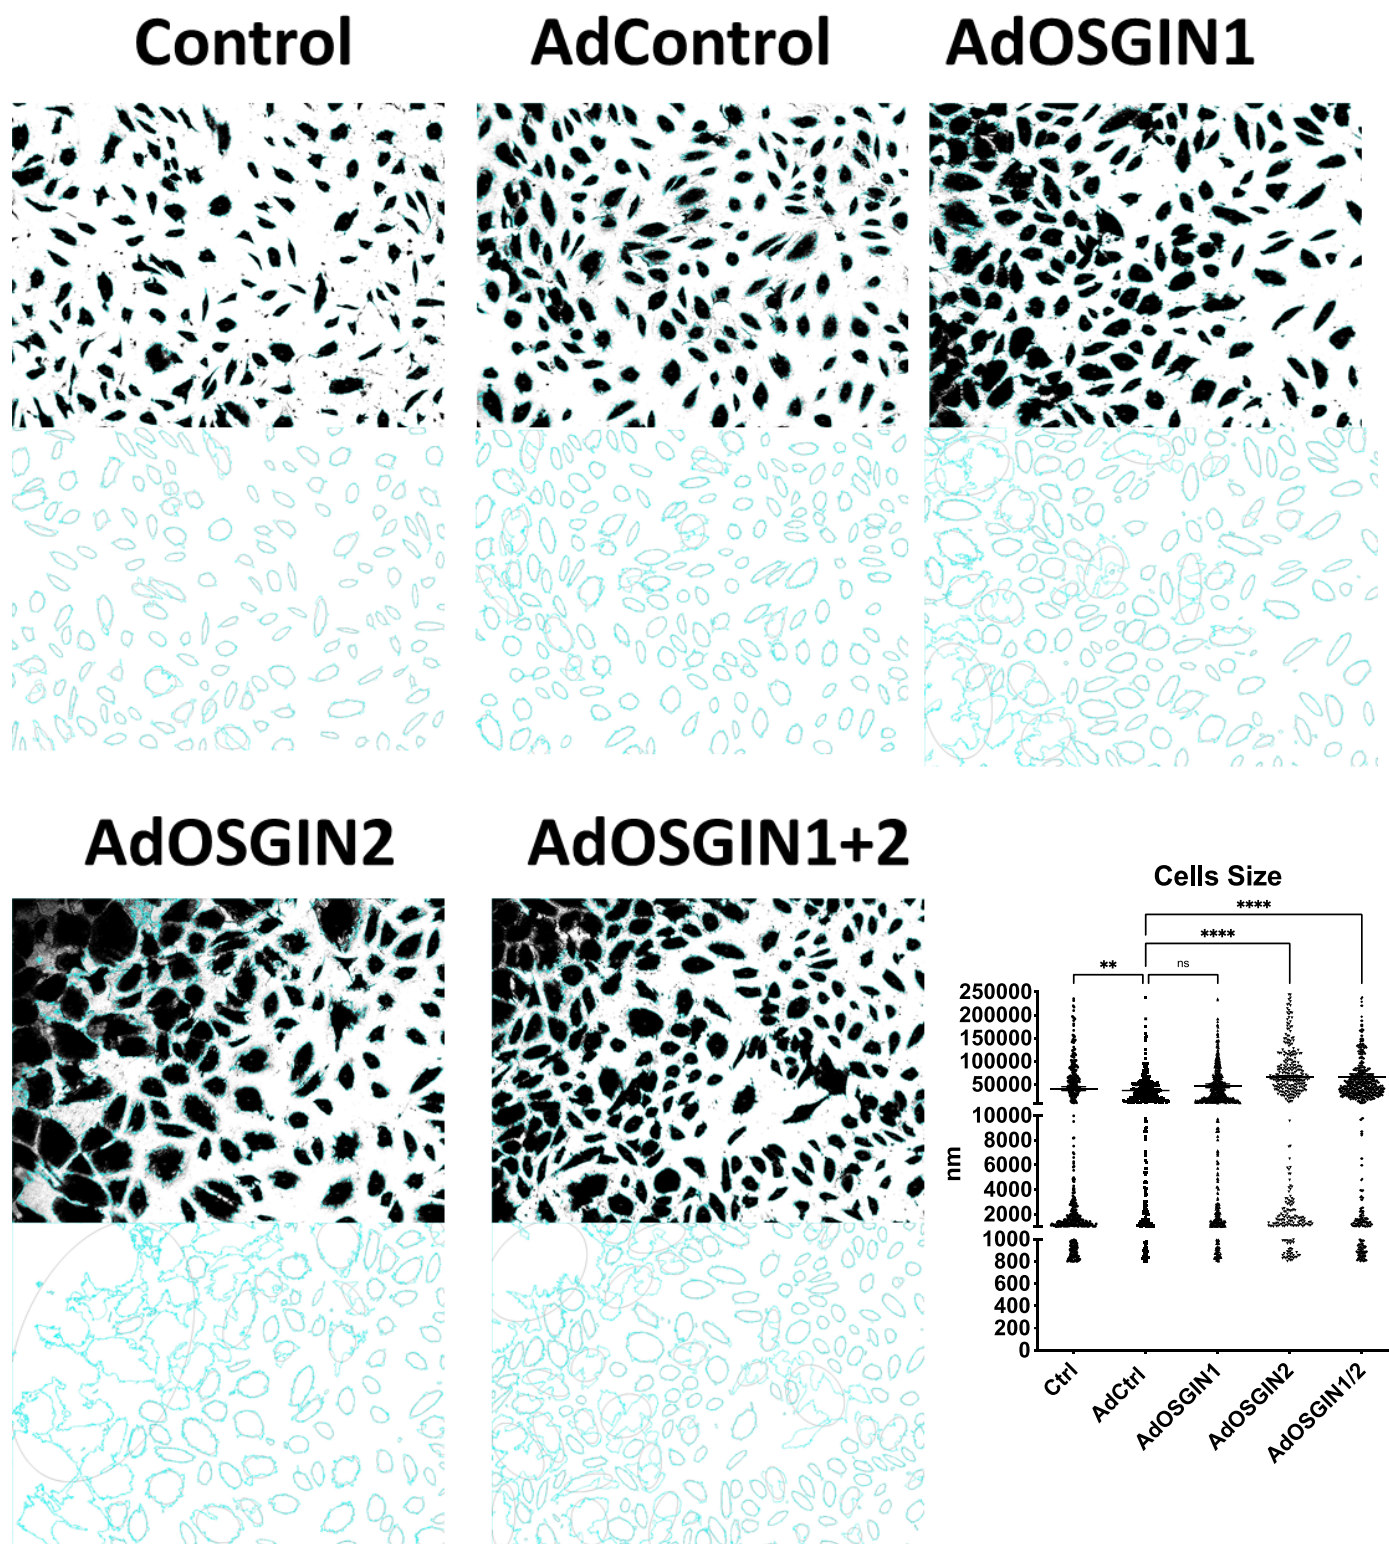

Figure S11: EC size analysis was evaluated through Image J custom particles analyser and multi cell outlier (ellipse fit correction). Five random pictures were analysed, and each cell area was automatically measured. AdOSGIN2 and AdOSGIN1+2 condition showed an increment in cell size with almost double the size compared to the Ctrl and AdCtrl. \*\* $P < 0.01$  AdOSGIN2 and \*\*\* $P < 0.001$  AdOSGIN1+2 vs AdCtrl.

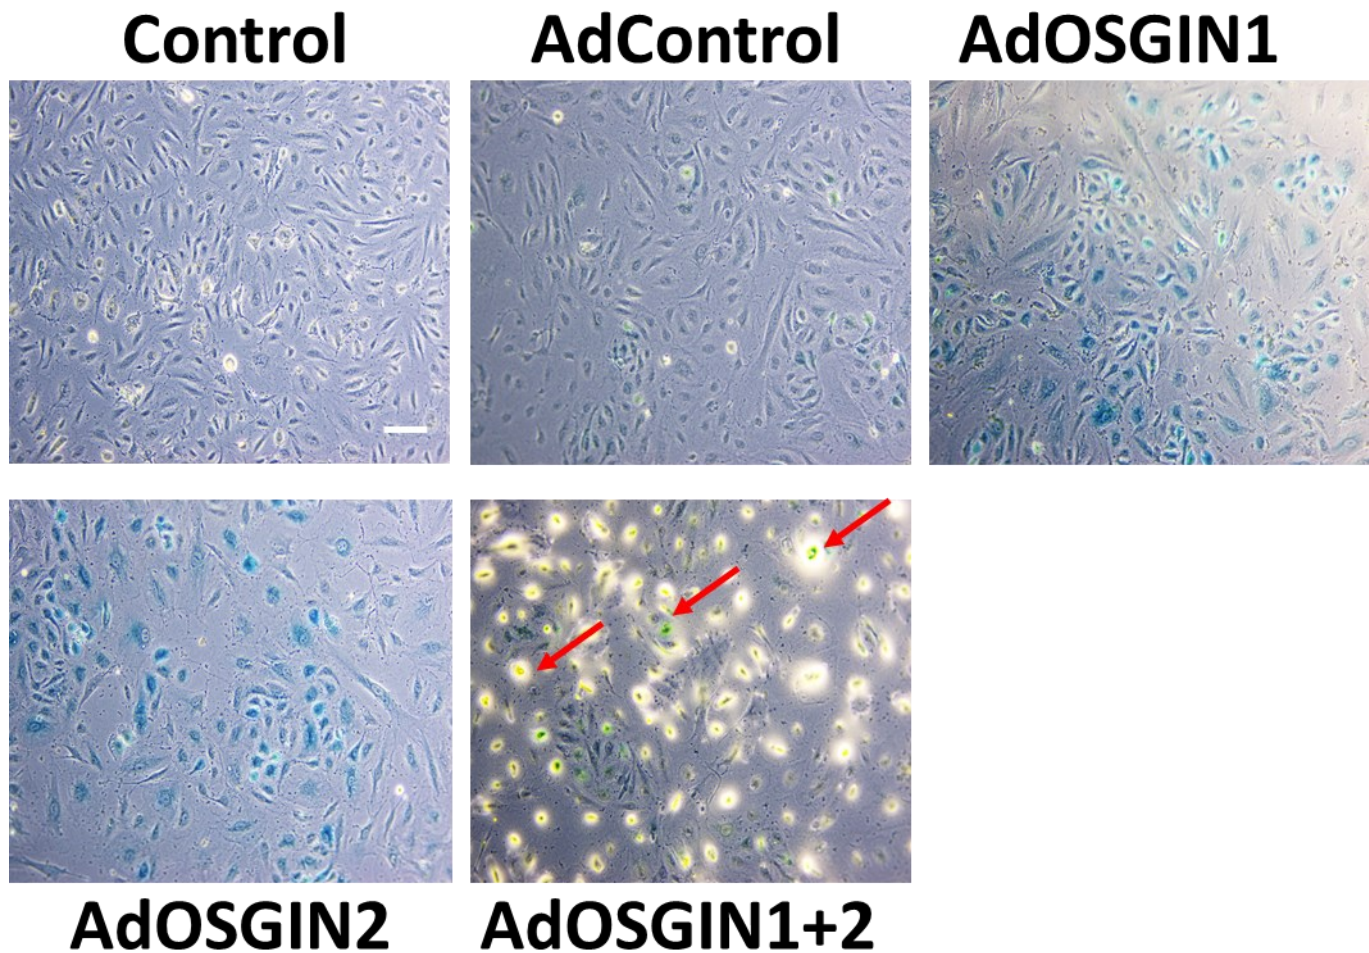

Figure S12. Senescence-associated beta-galactosidase (SA-β-galactosidase) senescence staining of HAECs transfected with adenoviral (OSGIN1, OSGIN2 and OSGIN1/2). Overexpression by ad of AdOSGIN1 and AdOSGIN2 induces senescent phenotypes in HCAECs. AdOSGIN1/2 overexpression shows green/blue senescence cells (red arrows) detached or in progress of detaching. SA-β-galactosidase assays were performed 40h after adenovirus transfection.



Supplementary Tables S5 Cluster 1, Genes and top 10 canonical pathways and regulators.

| Genes     |         | <b>Ingenuity Pathways</b>                 | <b>Canonical Pathways</b> | <b>Upstream Transcriptional Regulator</b> |
|-----------|---------|-------------------------------------------|---------------------------|-------------------------------------------|
| AHSA1     | HSPB1   | Aldosterone Signaling in Epithelial Cells |                           | HSF1                                      |
| ALDH3A2   | HSPB8   | Protein Ubiquitination Pathway            |                           | FBXW7                                     |
| ATF3      | HSPD1   | NRF2-mediated Stress Response             | Oxidative                 | PML                                       |
| B3GAT3    | HSPE1   | Unfolded protein response                 |                           | SP100                                     |
| BAG3      | HSPH1   | Glucocorticoid Signaling                  | Receptor                  | NFE2L2                                    |
| BANF1     | IERS5L  | eNOS Signaling                            |                           | TP53                                      |
| C3orf52   | IL7R    | Aryl Hydrocarbon Receptor Signaling       |                           | ETS1                                      |
| CACYBP    | JMJD6   | Huntington's Signaling                    | Disease                   | HSF2                                      |
| CBARP     | LGALS8  | Xenobiotic Signaling                      | Metabolism                | HTT                                       |
| CHKA      | LUC7L3  |                                           |                           | NUPR1                                     |
| CHORDC1   | MICB    |                                           |                           |                                           |
| CPNE8     | MLKL    |                                           |                           |                                           |
| CRYAB     | MRPL18  |                                           |                           |                                           |
| CRYZ      | MSX1    |                                           |                           |                                           |
| DEDD2     | NAPG    |                                           |                           |                                           |
| DNAJA1    | NDRG1   |                                           |                           |                                           |
| DNAJB1    | OSGIN1  |                                           |                           |                                           |
| DNAJB6    | P4HA2   |                                           |                           |                                           |
| EVI2B     | PATL1   |                                           |                           |                                           |
| FKBP4     | PAXBP1  |                                           |                           |                                           |
| FTL       | PLAUR   |                                           |                           |                                           |
| GDF15     | PLEKHB2 |                                           |                           |                                           |
| HIF3A     | PRPF38B |                                           |                           |                                           |
| HIST2H2BE | PTGES3  |                                           |                           |                                           |
| HMOX1     | RNF19B  |                                           |                           |                                           |
| HSP90AA1  | RSRP1   |                                           |                           |                                           |
| HSP90AB1  | SNX3    |                                           |                           |                                           |
| HSPA1A    | SPATS2L |                                           |                           |                                           |
| HSPA1B    | SQSTM1  |                                           |                           |                                           |
| HSPA4     | STIP1   |                                           |                           |                                           |
| HSPA6     | TRIM16  |                                           |                           |                                           |
| HSPA8     | TSPYL2  |                                           |                           |                                           |

Supplementary Tables S6 Cluster 2, Genes and top 10 canonical pathways and regulators.

| <b>Genes</b> |          | <b>Ingenuity Canonical Pathways</b>                                          | <b>Upstream Regulator</b> | <b>Transcriptional</b> |
|--------------|----------|------------------------------------------------------------------------------|---------------------------|------------------------|
| ANKRD10      | MX1      | Interferon Signaling                                                         | IRF7                      |                        |
| APOL6        | MX2      | Activation of IRF by Cytosolic Pattern Recognition Receptors                 | STAT1                     |                        |
| BATF2        | OAS1     | Role of Pattern Recognition Receptors in Recognition of Bacteria and Viruses | IRF1                      |                        |
| C19orf66     | OAS2     | Role of RIG1-like Receptors in Antiviral Innate Immunity                     | NKX2-3                    |                        |
| DDX58        | OASL     | Tetrahydrobiopterin Biosynthesis I                                           | IRF3                      |                        |
| DDX60        | OSGIN2   | Tetrahydrobiopterin Biosynthesis II                                          | IRF5                      |                        |
| DDX60L       | PARP14   | Retinoic acid Mediated Apoptosis Signaling                                   | TRIM24                    |                        |
| DHX58        | PARP9    | Toll-like Receptor Signaling                                                 | CNOT7                     |                        |
| DNAJA4       | PLSCR1   | Death Receptor Signaling                                                     | STAT3                     |                        |
| DTX3L        | PMAIP1   | Protein Ubiquitination Pathway                                               | STAT2                     |                        |
| EIF2AK2      | PPP1R18  |                                                                              |                           |                        |
| EPSTI1       | RSAD2    |                                                                              |                           |                        |
| GBP1         | SAMD9    |                                                                              |                           |                        |
| GCH1         | SAMD9L   |                                                                              |                           |                        |
| HERC6        | SERPINH1 |                                                                              |                           |                        |
| IFI35        | SLC15A3  |                                                                              |                           |                        |
| IFI44L       | SLC37A1  |                                                                              |                           |                        |
| IFIH1        | SP110    |                                                                              |                           |                        |
| IFIT1        | TAP1     |                                                                              |                           |                        |
| IFIT2        | TRIM21   |                                                                              |                           |                        |
| IFIT3        | TRIM26   |                                                                              |                           |                        |
| IFIT5        | TRIM69   |                                                                              |                           |                        |
| IFITM1       | UBC      |                                                                              |                           |                        |
| IRF7         | UBE2L6   |                                                                              |                           |                        |
| ISG15        | XAF1     |                                                                              |                           |                        |
| LY6E         |          |                                                                              |                           |                        |

Supplementary Tables S7 Cluster 3, Genes and top 10 canonical pathways and regulators.

| <b>Genes</b> |         | <b>Ingenuity Canonical Pathways</b>              | <b>Upstream Transcriptional Regulator</b> |
|--------------|---------|--------------------------------------------------|-------------------------------------------|
| ADM          | PRDX6   | NRF2-mediated Oxidative Stress Response          | MAFG                                      |
| ANGPT2       | SBDSP1  | Glutathione Biosynthesis                         | BACH1                                     |
| F2RL2        | SEC61G  | Pentose Phosphate Pathway (Non-oxidative Branch) | NFE2L2                                    |
| GCLM         | SELO    | Superoxide Radicals Degradation                  | KEAP1                                     |
| INA          | SLC17A9 | Prostanoid Biosynthesis                          | MAFK                                      |
| LENG9        | SNRPA1  | Phagosome Maturation                             | NFE2                                      |
| ME1          | TBXAS1  | Pentose Phosphate Pathway                        | PML                                       |
| MLLT11       | TKT     | $\gamma$ -glutamyl Cycle                         | KLF2                                      |
| NQO1         | TMEM156 | Glutathione Redox Reactions I                    | NFE2L1                                    |
| P4HA1        | TRIM16L | Gluconeogenesis I                                | PDX1                                      |
| PDE4B        | UPP1    |                                                  |                                           |
| PLPP2        | XPOT    |                                                  |                                           |
| PRDX1        | ZDHHC6  |                                                  |                                           |

Supplementary Tables S8. Cluster 4, Genes and top 10 canonical pathways and regulators.

| <b>Genes</b> |  | <b>Ingenuity Canonical Pathways</b> | <b>Upstream Transcriptional Regulator</b> |
|--------------|--|-------------------------------------|-------------------------------------------|
| ANGPTL4      |  | Oxidative Phosphorylation           | PHF1                                      |
| CTD-2015G9.2 |  | Mitochondrial Dysfunction           | COMMD3-BMI1                               |
| HOXA9        |  | Sirtuin Signaling Pathway           | KMT2A                                     |
| HOXB7        |  |                                     | MLLT1                                     |
| MT-CYB       |  |                                     | ASB2                                      |
| RPSAP58      |  |                                     | NKX2-3                                    |
| TNFSF18      |  |                                     | PSIP1                                     |
|              |  |                                     | HOXB3                                     |
|              |  |                                     | BHLHE41                                   |
|              |  |                                     | PLAGL1                                    |

Supplementary Tables S9. Cluster 5, Genes and top 10 canonical pathways and regulators.

| <b>Genes</b> |          | <b>Ingenuity Canonical Pathways</b>  | <b>Upstream Regulator</b> | <b>Transcriptional</b> |
|--------------|----------|--------------------------------------|---------------------------|------------------------|
| ALDH1A3      | MFSD11   | Coenzyme A Biosynthesis              | FOXH1                     |                        |
| AMDHD2       | NUP107   | N-acetylglucosamine Degradation I    | CITED1                    |                        |
| ANAPC5       | NUP160   | Phospholipases                       | Ncoa6                     |                        |
| ANKRD33B     | PACS1    | Endothelin-1 Signaling               | GSX2                      |                        |
| AP3M2        | PAN2     | N-acetylglucosamine Degradation II   | BHLHA15                   |                        |
| ATXN2        | PCMTD2   | Role of BRCA1 in DNA Damage Response | FOS                       |                        |
| C22orf29     | PIGQ     | Non-Small Cell Lung Cancer Signaling | VAV2                      |                        |
| CAPN11       | PLA2G4C  | Phospholipase C Signaling            |                           |                        |
| CHD1L        | PLD1     | Antioxidant Action of Vitamin C      |                           |                        |
| CLIP4        | PPCS     | Pancreatic Adenocarcinoma Signaling  |                           |                        |
| CPNE5        | RCBTB1   |                                      |                           |                        |
| DFNA5        | RFC3     |                                      |                           |                        |
| DHRS1        | RNF123   |                                      |                           |                        |
| DHRS11       | SESTD1   |                                      |                           |                        |
| EEF2K        | SLC35E2B |                                      |                           |                        |
| EVL          | SMARCC2  |                                      |                           |                        |
| HAS3         | STK38L   |                                      |                           |                        |
| HERC2        | SYNE2    |                                      |                           |                        |
| ITPR3        | TGFA     |                                      |                           |                        |
| KRIT1        | UQCRC2   |                                      |                           |                        |
| LETMD1       | VPS13C   |                                      |                           |                        |
| LRRC16A      | WDR59    |                                      |                           |                        |
| MED12        | ZC3H7A   |                                      |                           |                        |

Supplementary Tables S10. Cluster 6, Genes and top 10 canonical pathways and regulators.

| <b>Genes</b> |  | <b>Ingenuity Canonical Pathways</b>  | <b>Upstream Regulator</b> | <b>Transcriptional</b> |
|--------------|--|--------------------------------------|---------------------------|------------------------|
| BRIP1        |  | Role of BRCA1 in DNA Damage Response | CCND1                     |                        |
| ESCO2        |  |                                      | UXT                       |                        |
|              |  |                                      | FOXM1                     |                        |
|              |  |                                      | IRF1                      |                        |
|              |  |                                      | TCF4                      |                        |
|              |  |                                      | TCF3                      |                        |
|              |  |                                      | FOXO1                     |                        |

Supplementary Tables S11 Cluster 7, Genes and top 10 canonical pathways and regulators.

| Genes   |            | Ingenuity Canonical Pathways                                                    | Upstream Transcriptional Regulator |
|---------|------------|---------------------------------------------------------------------------------|------------------------------------|
| ABCA1   | LAMA2      | Adrenomedullin signaling pathway                                                | HTT                                |
| AEBP1   | LGALS9     | Role of Macrophages, Fibroblasts and Endothelial Cells in Rheumatoid Arthritis  | NKX2-3                             |
| AGRN    | LYPD1      | Antioxidant Action of Vitamin C                                                 | HOXA10                             |
| APOL1   | LYVE1      | P2Y Purigenic Receptor Signaling Pathway                                        | CREB1                              |
| BNC1    | MELTF      | Phospholipases                                                                  | SMARCA4                            |
| CARD11  | MGP        | Wnt/Ca+ pathway                                                                 | MECP2                              |
| CCDC3   | MYOM3      | Melatonin Signaling                                                             | STAT1                              |
| CDH11   | NEAT1      | GPCR-Mediated Integration of Enteroendocrine Signaling Exemplified by an L Cell | FOXF1                              |
| CFH     | NEFH       | Aldosterone Signaling in Epithelial Cells                                       | IRF2                               |
| CLDN11  | PCDH10     | Agrin Interactions at Neuromuscular Junction                                    | ATF4                               |
| CSF2RB  | PCDH17     |                                                                                 |                                    |
| CTHRC1  | PLCB2      |                                                                                 |                                    |
| CX3CL1  | PLCD1      |                                                                                 |                                    |
| DDR2    | PLCL1      |                                                                                 |                                    |
| DGKA    | POSTN      |                                                                                 |                                    |
| DKK2    | PSMB9      |                                                                                 |                                    |
| DOCK5   | PTPRU      |                                                                                 |                                    |
| DOCK8   | SAT1       |                                                                                 |                                    |
| DPP4    | SELENBP1   |                                                                                 |                                    |
| ERAP1   | SEMA7A     |                                                                                 |                                    |
| FAM129A | SLITRK4    |                                                                                 |                                    |
| FRAS1   | ST6GALNAC1 |                                                                                 |                                    |
| GATSL3  | STXBP2     |                                                                                 |                                    |
| HSPA12B | TACSTD2    |                                                                                 |                                    |
| IGFBP5  | TFAP2A     |                                                                                 |                                    |
| IL18R1  | TRPV2      |                                                                                 |                                    |
| ITGB3   | TUSC3      |                                                                                 |                                    |
| KLF4    | VCAM1      |                                                                                 |                                    |
| KRT19   |            |                                                                                 |                                    |

Supplementary Tables S12. Cluster 8, Genes and top 10 canonical pathways and regulators.

| Genes     |             | Ingenuity Canonical Pathways                        | Upstream Transcriptional Regulator |
|-----------|-------------|-----------------------------------------------------|------------------------------------|
|           | HSPG2       |                                                     | KLF2                               |
| A2M       | IGFBP2      | Atherosclerosis Signaling                           | TP53                               |
| ABCA7     | IL17RD      | Inhibition of Matrix Metalloproteases               | SP1                                |
| ACE       | IL33        | Adrenomedullin signaling pathway                    | TCF4                               |
| ACP5      | ITGA10      | Gap Junction Signaling                              | CALR                               |
| ADCY4     | ITPR1       | GP6 Signaling Pathway                               | CEBPA                              |
| ANK1      | KCND1       | eNOS Signaling                                      | BRD7                               |
| ANK3      | KCNN4       | Hepatic Fibrosis / Hepatic Stellate Cell Activation | ETS1                               |
| APLNR     | LIMCH1      | Renin-Angiotensin Signaling                         | IKZF1                              |
| APOB      | LPL         | Breast Cancer Regulation by Stathmin1               | ASB9                               |
| APOL4     | LRP1        | Dopamine-DARPP32 Feedback in cAMP Signaling         |                                    |
| AQP1      | MAMDC2      |                                                     |                                    |
| AQP3      | MAN1C1      |                                                     |                                    |
| ARHGEF9   | MAN2B2      |                                                     |                                    |
| ATHL1     | MFAP2       |                                                     |                                    |
| ATP2A3    | MMP17       |                                                     |                                    |
| B3GNT9    | MYO18A      |                                                     |                                    |
| BTN3A3    | NPR1        |                                                     |                                    |
| C10orf10  | PBX1        |                                                     |                                    |
| C10orf128 | PCMTD1      |                                                     |                                    |
| C10orf54  | PEG10       |                                                     |                                    |
| C14orf132 | PIDD1       |                                                     |                                    |
| C1RL      | PIK3R3      |                                                     |                                    |
| CALCOCO1  | PLPP3       |                                                     |                                    |
| CCND2     | PPARGC1B    |                                                     |                                    |
| CD24      | PPP1R14A    |                                                     |                                    |
| CD40      | PTGIS       |                                                     |                                    |
| CECR1     | RAPGEF5     |                                                     |                                    |
| CFI       | RP1-152L7.5 |                                                     |                                    |
| CKB       | RRAGB       |                                                     |                                    |
| CMKLR1    | SCUBE3      |                                                     |                                    |
| COL17A1   | SEMA3G      |                                                     |                                    |
| COL1A2    | SGCE        |                                                     |                                    |
| COL4A5    | SIAE        |                                                     |                                    |
| COLEC12   | SIDT2       |                                                     |                                    |
| DPYSL4    | SLC16A14    |                                                     |                                    |
| DYSF      | SLC46A3     |                                                     |                                    |
| EDA2R     | SLCO2A1     |                                                     |                                    |
| ENTPD1    | SLCO2B1     |                                                     |                                    |
| EPS8L2    | SNED1       |                                                     |                                    |
| ERV3-1    | SORT1       |                                                     |                                    |
| FBLN2     | STAB1       |                                                     |                                    |
| FBN1      | SULF1       |                                                     |                                    |
| FKBP9     | TMOD1       |                                                     |                                    |
| GAA       | TNFRSF14    |                                                     |                                    |
| GAL3ST4   | TNS1        |                                                     |                                    |
| GJA4      | TPCN1       |                                                     |                                    |

|        |        |
|--------|--------|
| GJA5   | TRIM66 |
| GPR146 | USHBP1 |
| HEG1   | VASH1  |
| HHAT   | VCAN   |
| HMCN1  | ZNF366 |



Supplementary Tables S13. AdOSGIN1 vs AdControl, Genes and top 20 canonical pathways and regulators.

| Genes        |              |         |              |                | Ingenuity Canonical Pathways                                                    | Upstream Transcriptional Regulator |
|--------------|--------------|---------|--------------|----------------|---------------------------------------------------------------------------------|------------------------------------|
| A2M          | CMKLR1       | HSPA1B  | OSGIN2       | SLITRK4        | Aldosterone Signaling in Epithelial Cells                                       | TP53                               |
| ABCA1        | COL17A1      | HSPA4   | P4HA1        | SNED1          | Adrenomedullin signaling pathway                                                | EPAS1                              |
| ABCA7        | COL1A2       | HSPA6   | PACS1        | SNRPA1         | Atherosclerosis Signaling                                                       | HIF1A                              |
| ACE          | COL4A5       | HSPB8   | PAN2         | SORT1          | eNOS Signaling                                                                  | KLF2                               |
| ACP5         | COLEC12      | HSPD1   | PBX1         | ST6GAL<br>NAC1 | Hepatic Fibrosis / Hepatic Stellate Cell Activation                             | NKX2-3                             |
| ADCY4        | CPNE5        | HSPG2   | PCDH10       | STAB1          | Sperm Motility                                                                  | NEUROG1                            |
| ADM          | CRYAB        | IGFBP2  | PCDH17       | STK38L         | Cellular Effects of Sildenafil (Viagra)                                         | SP1                                |
| AEBP1        | CSF2RB       | IGFBP5  | PCMTD1       | STXBP2         | Dopamine-DARPP32 Feedback in cAMP Signaling                                     | NFKBIA                             |
| AGRN         | CTD-2015G9.2 | IL17RD  | PCMTD2       | SULF1          | Gap Junction Signaling                                                          | ETS1                               |
| ALDH1A3      | CTHRC1       | IL18R1  | PDE4B        | SYNE2          | Prostanoid Biosynthesis                                                         | HTT                                |
| AMDHD2       | CX3CL1       | IL33    | PEG10        | TACSTD<br>2    | Endothelin-1 Signaling                                                          | STAT3                              |
| ANGPT2       | DDR2         | INA     | PIDD1        | TBXAS1         | GP6 Signaling Pathway                                                           | NUPR1                              |
| ANGPTL4      | DGKA         | ITGA10  | PIK3R3       | TFAP2A         | GPCR-Mediated Integration of Enteroendocrine Signaling Exemplified by an L Cell | TWIST1                             |
| ANK1         | DHRS1        | ITGB3   | PLA2G4C      | TGFA           | Synaptic Long Term Depression                                                   | MAFG                               |
| ANK3         | DKK2         | ITPR1   | PLCB2        | TKT            | Neuropathic Pain Signaling In Dorsal Horn Neurons                               | MYB                                |
| ANKRD33<br>B | DOCK5        | ITPR3   | PLCD1        | TMEM15<br>6    | Dendritic Cell Maturation                                                       | KEAP1                              |
| AP3M2        | DOCK8        | JMJD6   | PLCL1        | TMOD1          | Phospholipases                                                                  | KDM3A                              |
| APLN         | DPP4         | KCND1   | PLPP2        | TNFRSF1<br>4   | Inhibition of Matrix Metalloproteases                                           | BACH1                              |
| APOB         | DPYSL4       | KCNN4   | PLPP3        | TNFSF18        | Thrombin Signaling                                                              | NFE2L2                             |
| APOL1        | DYSF         | KLF4    | POSTN        | TNS1           | Protein Ubiquitination Pathway                                                  | HOXA10                             |
| APOL4        | EDA2R        | KRT19   | PPARGC1<br>B | TPCN1          |                                                                                 |                                    |
| AQP1         | ENTPD1       | LAMA2   | PPP1R14A     | TRIM16         |                                                                                 |                                    |
| AQP3         | EPS8L2       | LENG9   | PRDX1        | TRIM16L        |                                                                                 |                                    |
| ARHGEF9      | ERAP1        | LETMD1  | PRDX6        | TRIM66         |                                                                                 |                                    |
| ATHL1        | ERV3-1       | LGALS9  | PSMB9        | TRPV2          |                                                                                 |                                    |
| ATP2A3       | EVL          | LIMCH1  | PTGES3       | TUSC3          |                                                                                 |                                    |
| B3GNT9       | F2RL2        | LPL     | PTGIS        | UPP1           |                                                                                 |                                    |
| BNC1         | FAM129A      | LRP1    | PTPRU        | UQCRC2         |                                                                                 |                                    |
| BTN3A3       | FBLN2        | LRRC16A | RAPGEF5      | USHBP1         |                                                                                 |                                    |

|           |          |        |             |        |
|-----------|----------|--------|-------------|--------|
| C10orf10  | FBN1     | LYPD1  | RCBTB1      | VASH1  |
| C10orf128 | FKBP4    | LYVE1  | RNF123      | VCAM1  |
| C10orf54  | FKBP9    | MAMDC2 | RP1-152L7.5 | VCAN   |
| C14orf132 | FRAS1    | MAN1C1 | RPSAP58     | VPS13C |
| C1RL      | GAA      | MAN2B2 | RRAGB       | XPOT   |
| CACYBP    | GAL3ST4  | ME1    | SAT1        | ZNF366 |
| CALCOO1   | GATSL3   | MELTF  | SCUBE3      |        |
| CAPN11    | GCLM     | MFAP2  | SEC61G      |        |
| CARD11    | GDF15    | MFSD11 | SELENBP1    |        |
| CCDC3     | GJA4     | MGP    | SELO        |        |
| CCND2     | GJA5     | MLLT11 | SEMA3G      |        |
| CD24      | GPR146   | MMP17  | SEMA7A      |        |
| CD40      | HEG1     | MT-CYB | SGCE        |        |
| CDH11     | HHAT     | MYO18A | SIAE        |        |
| CECR1     | HMCN1    | MYOM3  | SIDT2       |        |
| CFH       | HMOX1    | NEAT1  | SLC16A14    |        |
| CFI       | HOXA9    | NEFH   | SLC17A9     |        |
| CHORDC1   | HOXB7    | NPR1   | SLC35E2B    |        |
| CKB       | HSP90AA1 | NQO1   | SLC46A3     |        |
| CLDN11    | HSPA12B  | NUP160 | SLCO2A1     |        |
| CLIP4     | HSPA1A   | OSGIN1 | SLCO2B1     |        |

Supplementary Tables S14. AdOSGIN2 vs AdControl, Genes and top 20 canonical pathways and regulators.

| <b>Genes</b> | <b>Ingenuity Canonical Pathways</b>                         | <b>Upstream Transcriptional Regulator</b> |
|--------------|-------------------------------------------------------------|-------------------------------------------|
| HERC6        | Interferon Signaling                                        | IRF7                                      |
| HSPA6        | Role of Lipids/Lipid Rafts in the Pathogenesis of Influenza | STAT3                                     |
| IFIT1        | Unfolded protein response                                   | STAT1                                     |
| IFIT3        | Aldosterone Signaling in Epithelial Cells                   | IRF1                                      |
| MX2          | eNOS Signaling                                              | IRF5                                      |
| OASL         | Huntington's Disease Signaling                              | IRF3                                      |
| OSGIN2       | Protein Ubiquitination Pathway                              | STAT2                                     |
| RSAD2        | Glucocorticoid Receptor Signaling                           | SPI1                                      |
| XAF1         |                                                             | TRIM24                                    |
|              |                                                             | NFATC2                                    |
|              |                                                             | IRF9                                      |
|              |                                                             | MSC                                       |
|              |                                                             | BRCA1                                     |
|              |                                                             | SP100                                     |
|              |                                                             | IKZF3                                     |
|              |                                                             | SIRT1                                     |
|              |                                                             | CNOT7                                     |
|              |                                                             | SQSTM1                                    |
|              |                                                             | POU2AF1                                   |
|              |                                                             | HOXD10                                    |

Supplementary Tables S15. AdOSGIN1&2 vs AdControl, Genes and top 20 canonical pathways and regulators.

| Genes    |           |         |         | Ingenuity Pathways                                                           | Canonical Pathways | Upstream Transcriptional Regulator |
|----------|-----------|---------|---------|------------------------------------------------------------------------------|--------------------|------------------------------------|
| AHSA1    | GCLM      | NUP107  | TRIM16  | Aldosterone Signaling in Epithelial Cells                                    |                    | IRF7                               |
| ALDH3A2  | GDF15     | OAS1    | TRIM16L | Protein Ubiquitination Pathway                                               |                    | HSF1                               |
| AMDHD2   | HAS3      | OAS2    | TRIM21  | Interferon Signaling                                                         |                    | NKX2-3                             |
| ANAPC5   | HERC2     | OASL    | TRIM26  | NRF2-mediated Oxidative Stress Response                                      |                    | STAT1                              |
| ANGPT2   | HERC6     | OSGIN1  | TRIM69  | Activation of IRF by Cytosolic Pattern Recognition Receptors                 |                    | IRF5                               |
| ANKRD10  | HIF3A     | OSGIN2  | TSPYL2  | Unfolded protein response                                                    |                    | IRF1                               |
| AP3M2    | HIST2H2BE | P4HA1   | UBC     | Role of Pattern Recognition Receptors in Recognition of Bacteria and Viruses |                    | CNOT7                              |
| APOL6    | HMOX1     | P4HA2   | UBE2L6  | Role of RIG1-like Receptors in Antiviral Innate Immunity                     |                    | TRIM24                             |
| ATF3     | HSP90AA1  | PACS1   | UQCRC2  | eNOS Signaling                                                               |                    | IRF3                               |
| ATXN2    | HSP90AB1  | PARP14  | UTP3    | Glucocorticoid Receptor Signaling                                            |                    | STAT2                              |
| B3GAT3   | HSPA1A    | PARP9   | VPS13C  | Aryl Hydrocarbon Receptor Signaling                                          |                    | STAT3                              |
| BAG3     | HSPA1B    | PATL1   | WDR59   | Pathogenesis of Multiple Sclerosis                                           |                    | IRF9                               |
| BANF1    | HSPA4     | PAXBP1  | XAF1    | Hypoxia Signaling in the Cardiovascular System                               |                    | SPI1                               |
| BATF2    | HSPA6     | PIGQ    | ZC3H7A  | Huntington's Disease Signaling                                               |                    | PML                                |
| BRIP1    | HSPA8     | PLAUR   | ZDHHC6  | Choline Biosynthesis III                                                     |                    | BRCA1                              |
| C19orf66 | HSPB1     | PLD1    | ZFAND2A | Primary Immunodeficiency Signaling                                           |                    | SIRT1                              |
| C22orf29 | HSPB8     | PLEKHB2 | ZNF207  | Xenobiotic Metabolism Signaling                                              |                    | IRF2                               |
| C3orf52  | HSPD1     | PLSCR1  | ZNF622  | Mitotic Roles of Polo-Like Kinase                                            |                    | NFE2L2                             |
| CACYBP   | HSPE1     | PMAIP1  |         | IL-17A Signaling in Gastric Cells                                            |                    | FBXW7                              |
| CBARP    | HSPH1     | PPCS    |         | Coenzyme A Biosynthesis                                                      |                    | TP53                               |
| CHD1L    | IER5L     | PPP1R18 |         |                                                                              |                    |                                    |
| CHKA     | IFI35     | PRDX1   |         |                                                                              |                    |                                    |
| CHORDC1  | IFI44L    | PRPF38B |         |                                                                              |                    |                                    |
| CLIP4    | IFIH1     | PTGES3  |         |                                                                              |                    |                                    |
| CPNE8    | IFIT1     | RCBTB1  |         |                                                                              |                    |                                    |
| CRYAB    | IFIT2     | RFC3    |         |                                                                              |                    |                                    |
| CRYZ     | IFIT3     | RNF123  |         |                                                                              |                    |                                    |
| DDX58    | IFIT5     | RNF19B  |         |                                                                              |                    |                                    |
| DDX60    | IFITM1    | RSAD2   |         |                                                                              |                    |                                    |
| DDX60L   | IL7R      | RSRP1   |         |                                                                              |                    |                                    |
| DEDD2    | IRF7      | SAMD9   |         |                                                                              |                    |                                    |

|         |        |          |  |
|---------|--------|----------|--|
| DFNA5   | ISG15  | SAMD9L   |  |
| DHRS1   | ITPR3  | SBDSP1   |  |
| DHRS11  | JMJD6  | SEC61G   |  |
| DHX58   | KRIT1  | SELO     |  |
| DNAJA1  | LGALS8 | SERPINH1 |  |
| DNAJA4  | LUC7L3 | SESTD1   |  |
| DNAJB1  | LY6E   | SLC15A3  |  |
| DNAJB6  | MED12  | SLC35E2B |  |
| DTX3L   | MFSD11 | SLC37A1  |  |
| EEF2K   | MICB   | SMARCC2  |  |
| EIF2AK2 | MLKL   | SNX3     |  |
| EPSTI1  | MLLT11 | SP110    |  |
| ESCO2   | MRPL18 | SPATS2L  |  |
| EVI2B   | MSX1   | SQSTM1   |  |
| EVL     | MX1    | STIP1    |  |
| FKBP4   | MX2    | SYNE2    |  |
| FTL     | NAPG   | TAP1     |  |
| GBP1    | NDRG1  | TGFA     |  |
| GCH1    | NQO1   | TKT      |  |

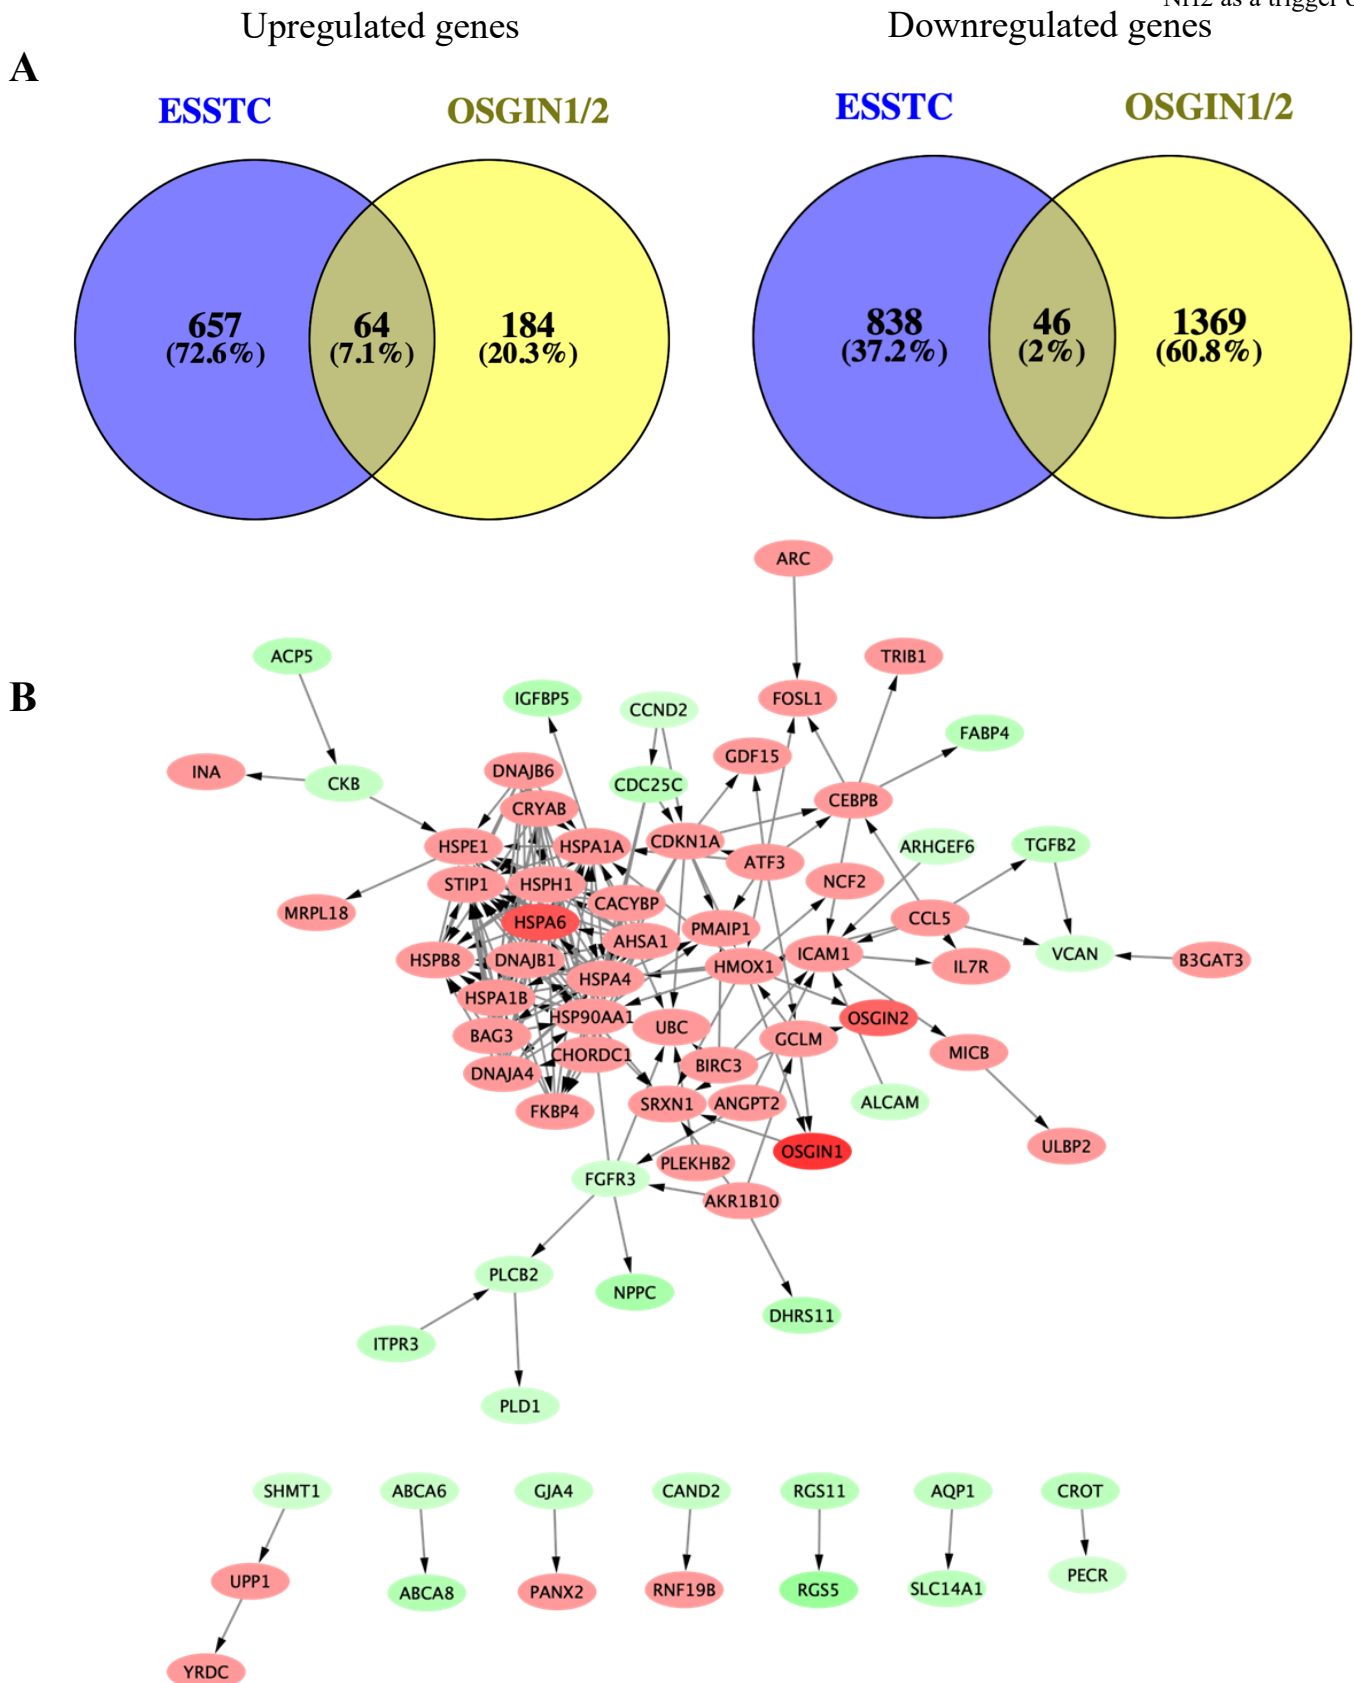

Figure S14. ESSTC and OSGIN1&2 coregulated genes: a) Genes significantly regulated under conditions of ESSTC (compared to ESS >2-fold change,  $p_{adj} < 0.05$ ) and OSGIN1/2 (compared to virus control, >1.5-fold change,  $p_{adj} < 0.05$ ). B) neighbor network analysis was carried out using cytoscape. ATF3 was observed to be the gene regulator of GDF15 and HSP70 (HSPA1A).

Supplementary Tables S16, Genes significantly regulated under conditions of ESSTC (compared to ESS >2-fold change, p adj <0.05) and OSGIN1/2 (compared to virus control, >1.5-fold change, p adj < 0.05)

### Upregulated Genes

|         |         |         |          |
|---------|---------|---------|----------|
| HSPA6   | GDF15   | UPP1    | INA      |
| ATF3    | KLHL21  | GCLM    | ICAM1    |
| CRYAB   | OSGIN2  | HSPB8   | CCL5     |
| HSPA7   | BAMBI   | BAG3    | HSP90AA1 |
| MMP10   | SLC12A8 | TMEM140 | YRDC     |
| BIRC3   | HSPA1A  | DEDD2   | ARC      |
| IL7R    | TRIB1   | TNIP3   | CHORDC1  |
| ANGPT2  | HMOX1   | JMJD6   | HSPA4    |
| SRXN1   | NCF2    | FOSL1   | B3GAT3   |
| ZFAND2A | MICB    | PANX2   | HSPE1    |
| PMAIP1  | MSX1    | STIP1   | TMEM156  |
| DNAJA4  | UBC     | FKBP4   | DNAJB6   |
| AKR1B10 | TSPYL2  | AHSA1   | CACYBP   |
| OSGIN1  | HSPA1B  | HSPH1   | MRPL18   |
| CDKN1A  | CEBPB   | SPATS2L | PLEKHB2  |
| DNAJB1  | FAM46A  | RNF19B  | ULBP2    |

### Downregulated genes

|         |         |        |        |
|---------|---------|--------|--------|
| TGFB2   | ABCA8   | ADCY4  | GJA4   |
| PECR    | VCAN    | OPRL1  | IGFBP5 |
| CDC25C  | ALCAM   | CKB    | CAPN11 |
| ANKRD35 | PLD1    | EEF2K  | MAMDC2 |
| ANXA2P1 | LIMCH1  | NPPC   | VIPR1  |
| PLCB2   | PALM    | EVL    | ACP5   |
| SHMT1   | ARHGEF6 | ACAD11 | GJA4   |
| PIK3IP1 | FABP4   | AQP1   | IGFBP5 |
| DHRS11  | CROT    | CCND2  | CAPN11 |
| DDR2    | CAND2   | APLN   | MAMDC2 |
| RGS5    | ABCA6   | CAPN11 | VIPR1  |
| ABCA7   | ASAP3   | MAMDC2 | ACP5   |
| ITPR3   | SLC14A1 | VIPR1  | GJA4   |
| GRB14   | LYPD1   | ACP5   | IGFBP5 |
| RGS11   | FGFR3   |        |        |



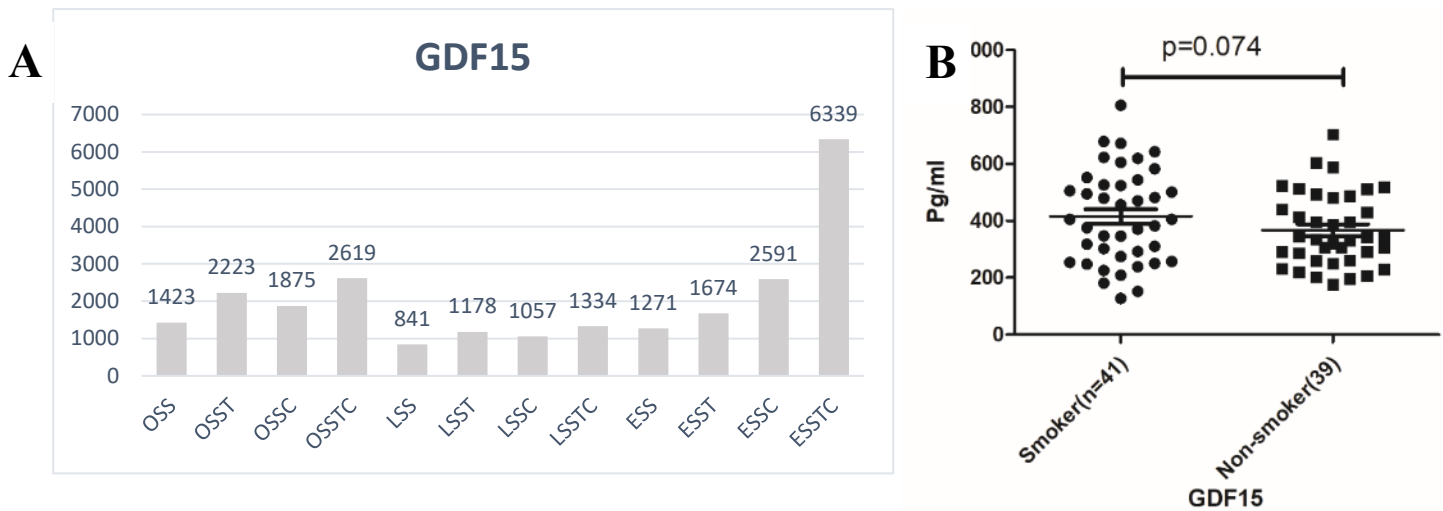

Figure S15, GDF15 regulation. A) Transcriptomic evaluation of GDF15 in HCAECs cultured under oscillatory (OSS), laminar (LSS) and elevated (ESS) shear stress on HCAECs treated with control, 3 doses of 5ng/ml TNF $\alpha$  (T), 3 doses of 10% CSE (C) or the combination of TNF $\alpha$  and CSE (TC), n=3 per condition, as described in Fig 1A. ESSTC significantly increased compared to ESS control (adj p = 1.2E-06). B) comparison of the effect of smoking on GDF15 levels in ACS patient serum combining both plaque rupture and plaque erosion patients.

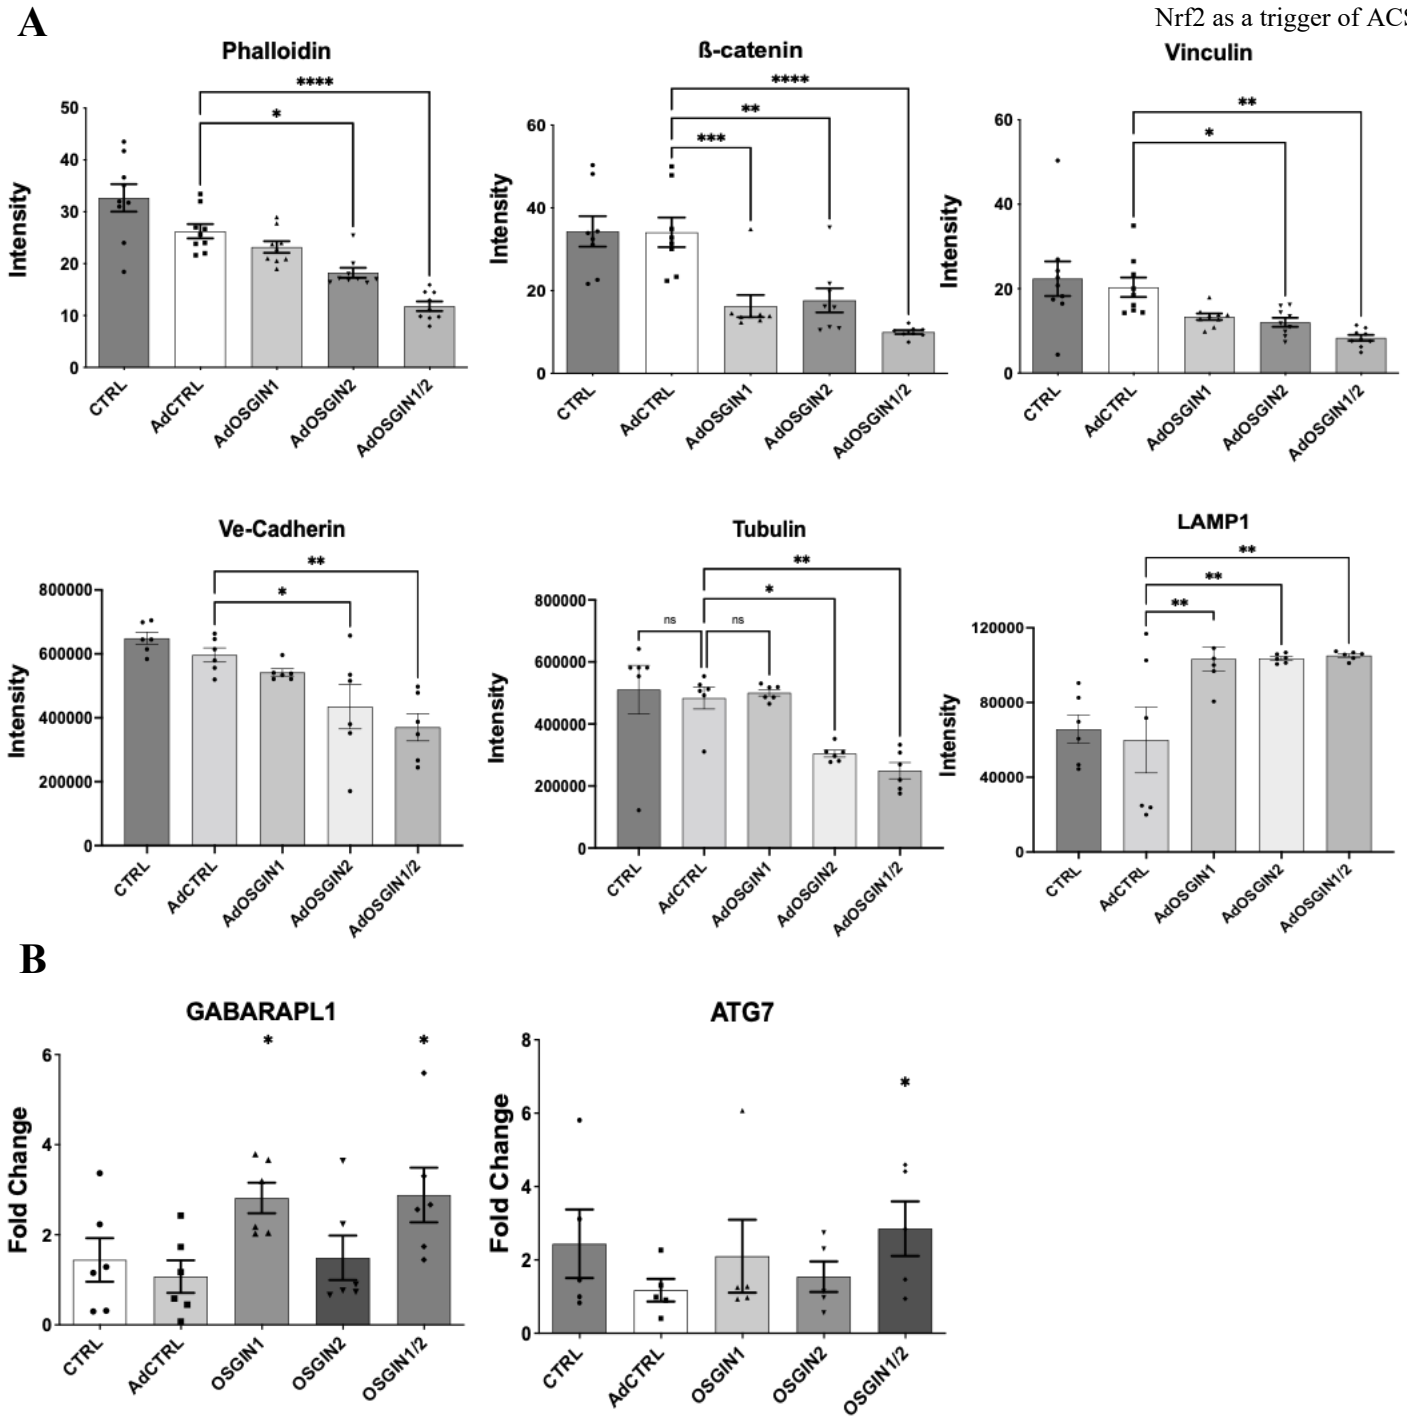

Figure S16: a) Immunocytochemical analysis indicated loss of focal adhesions, stress fibres and tubulin ( $n=3$ ;  $P<0.05$ ,  $P<0.01$  and  $P<0.001$ ), LAMP1 accumulation around nuclei was reported. b) GABARAPL1 (in AdOSGIN1 and AdOSGIN1+2) and ATG7 (AdOSGIN1+2) gene expression level increased compared to AdCTRL  $*P<0.05$ .

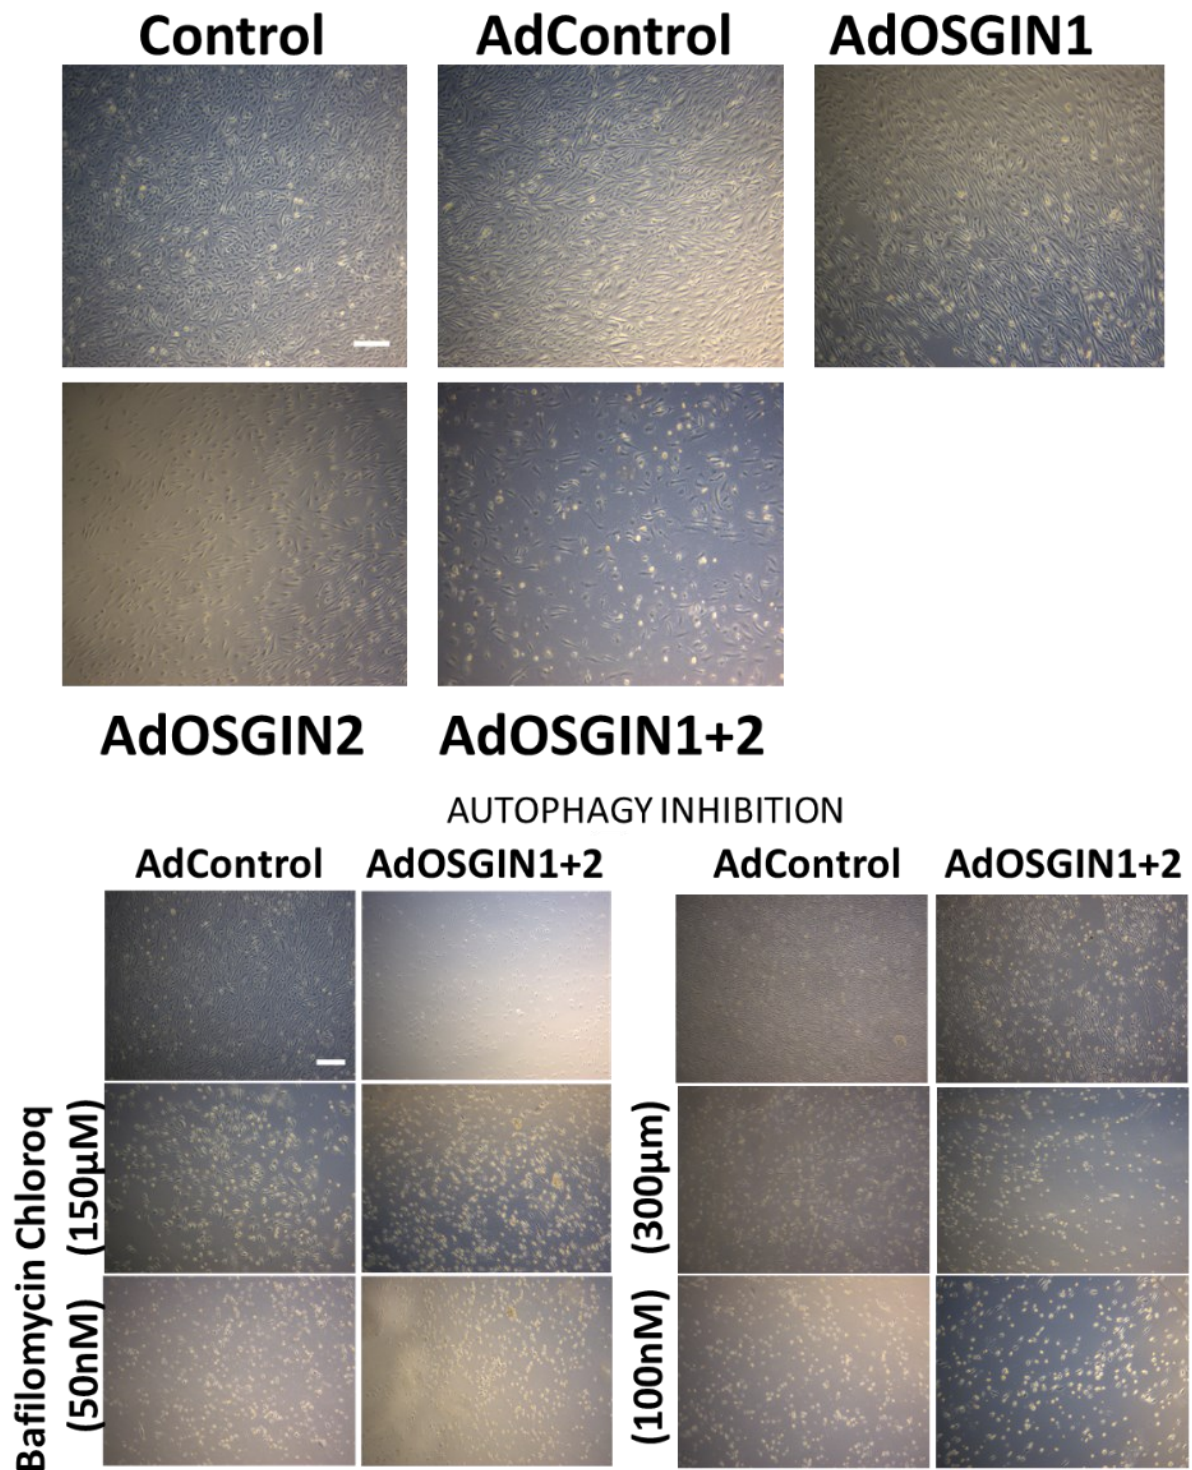

Figure S17. Images of HCAECs treated with chloroquine (150µM), bafilomycin (50nM), or OSGIN1&2 overexpression induced comparable, non-synergistic detachment (mean  $\pm$  SD, two-way ANOVA, \*\*P<0.01, \*\*\*P<0.001 v AdCTRL, n=4) corresponding to the analysis presented in Fig 7C in the main text.



## RESCUE EXPERIMENT

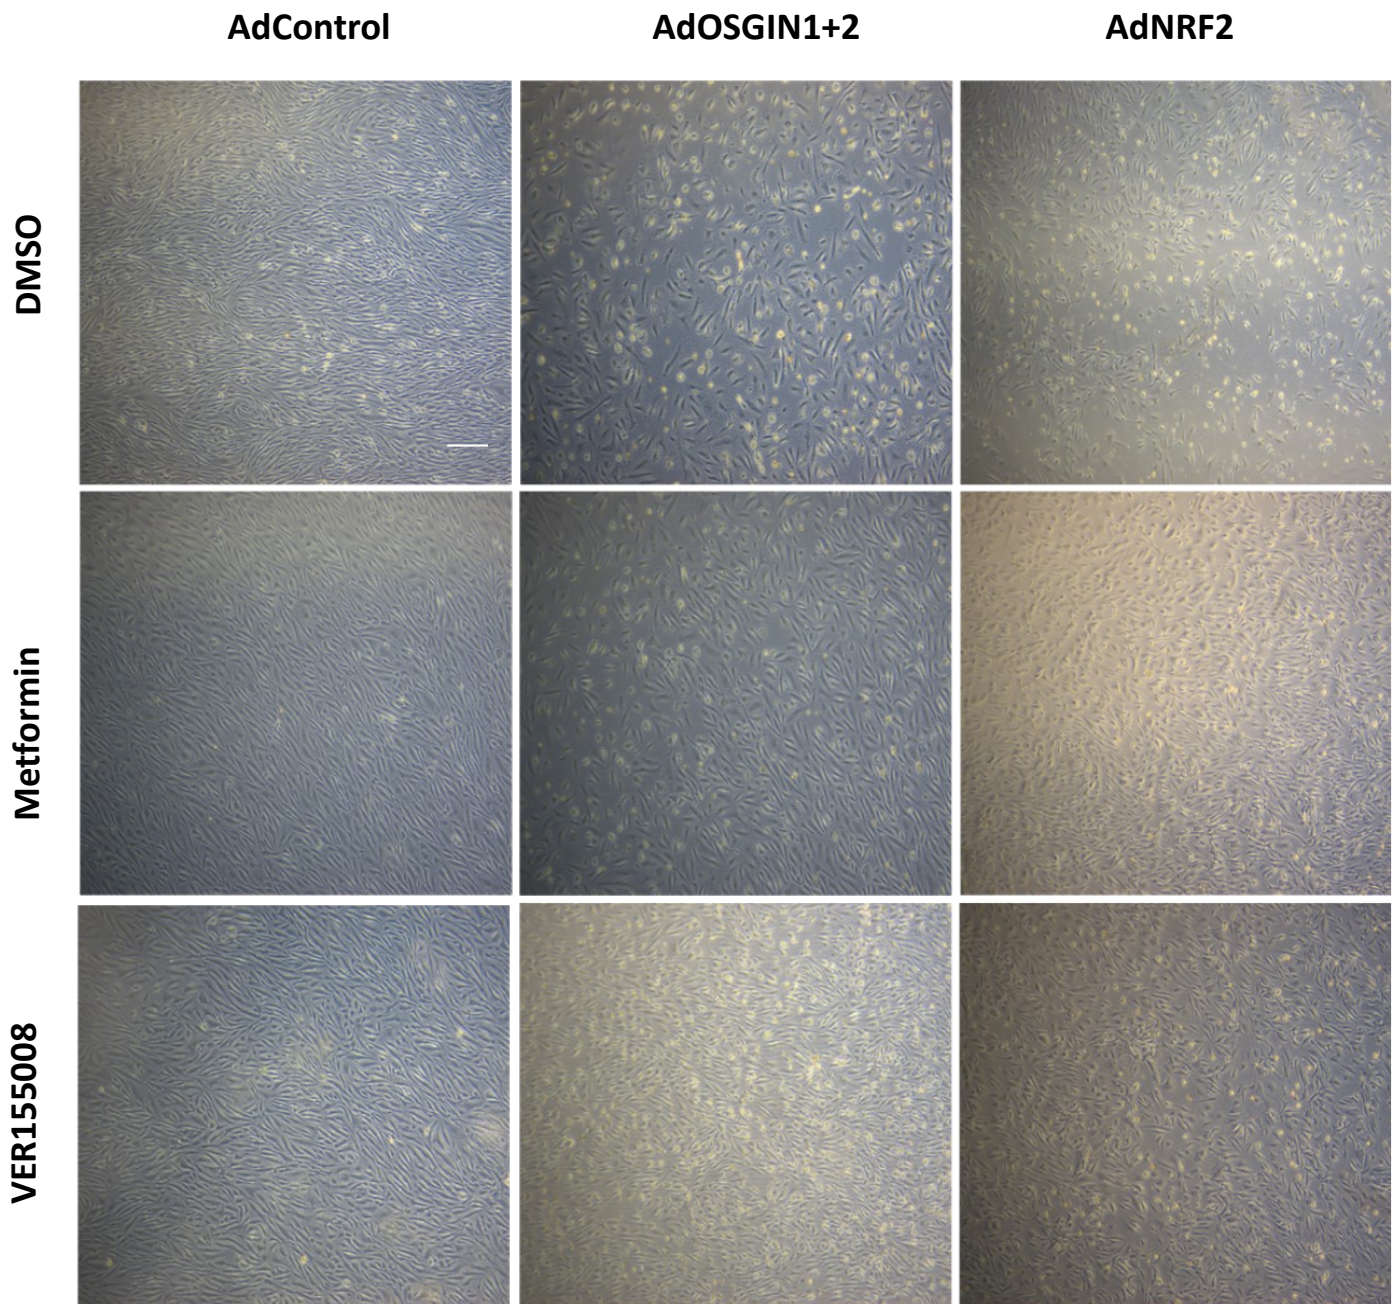

Figure S18: Confluent layer of ECs was seeded on a six-well plate. Adenoviral overexpression (AdCTRL, AdOSGIN1+2, and AdNRF2) was carried out. Following adenoviral transfection, EC were flowed on orbital shaker (210rpm, 3ml) in combination with DMSO, Metformin, and VER-155008) for 72hrs. (See quantification Figure 5E main text)

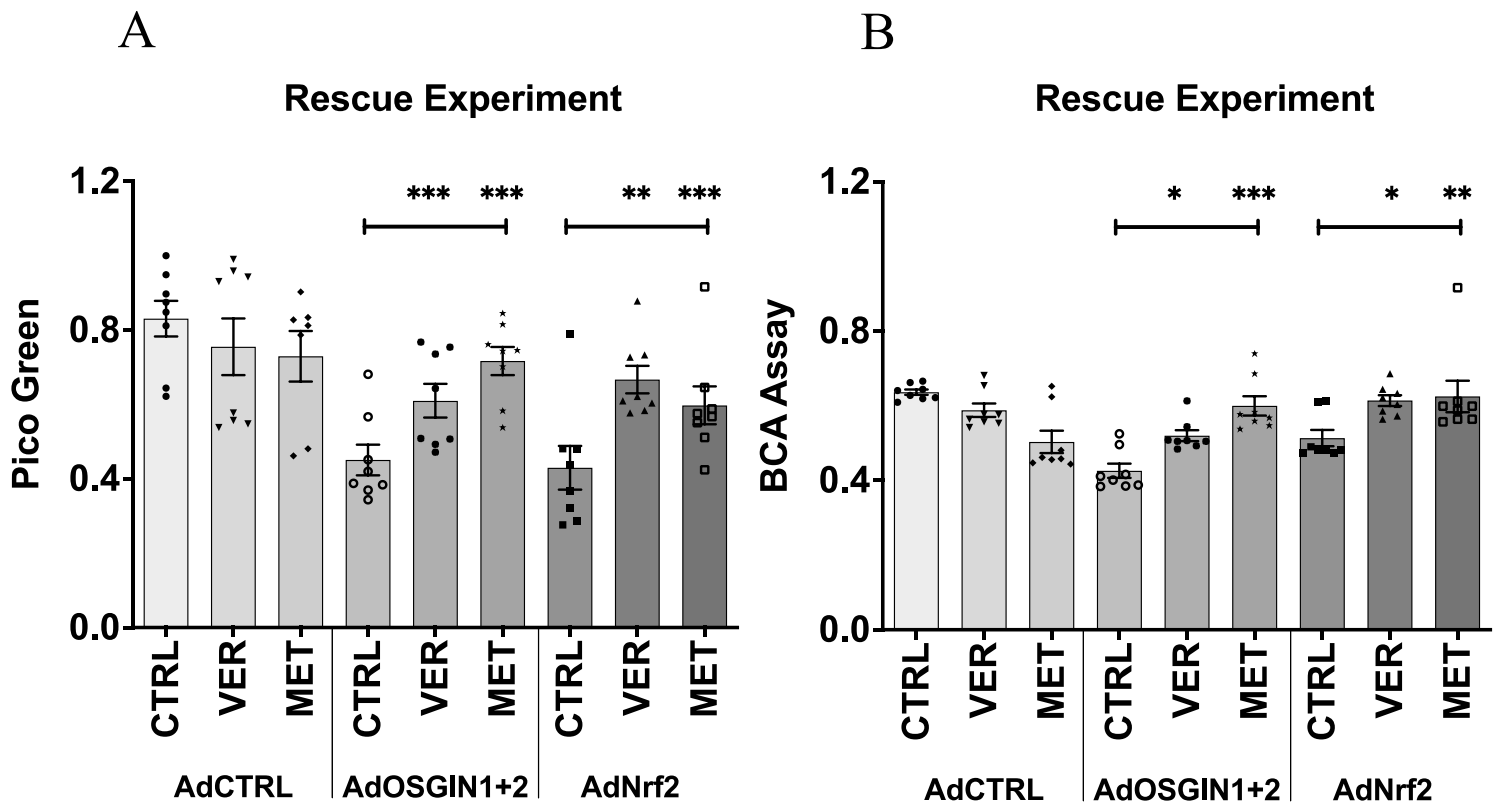

Figure S19. Comparison of different normalisation techniques. Because of the change in cell size, depth (and therefore assumed volume) and increase in number of nuclei per cell (Figures S14c,d; S15; S16), we calculated cell detachment as % coverage (Figure 5E main text). We repeated the analysis of detachment using by A) DNA quantification<sup>2, 16, 17</sup> or B) protein content of the cell lysate. These gave equivalent result as presented in Figure 5E. OSGIN1+2 or Nrf2-mediated cell detachment was reduced by co-treatment with Ver155008 (15µM), or Metformin (100µM); (\*P<0.05, \*\*P<0.01, \*\*\*P<0.001, n=3, Two-way ANOVA).

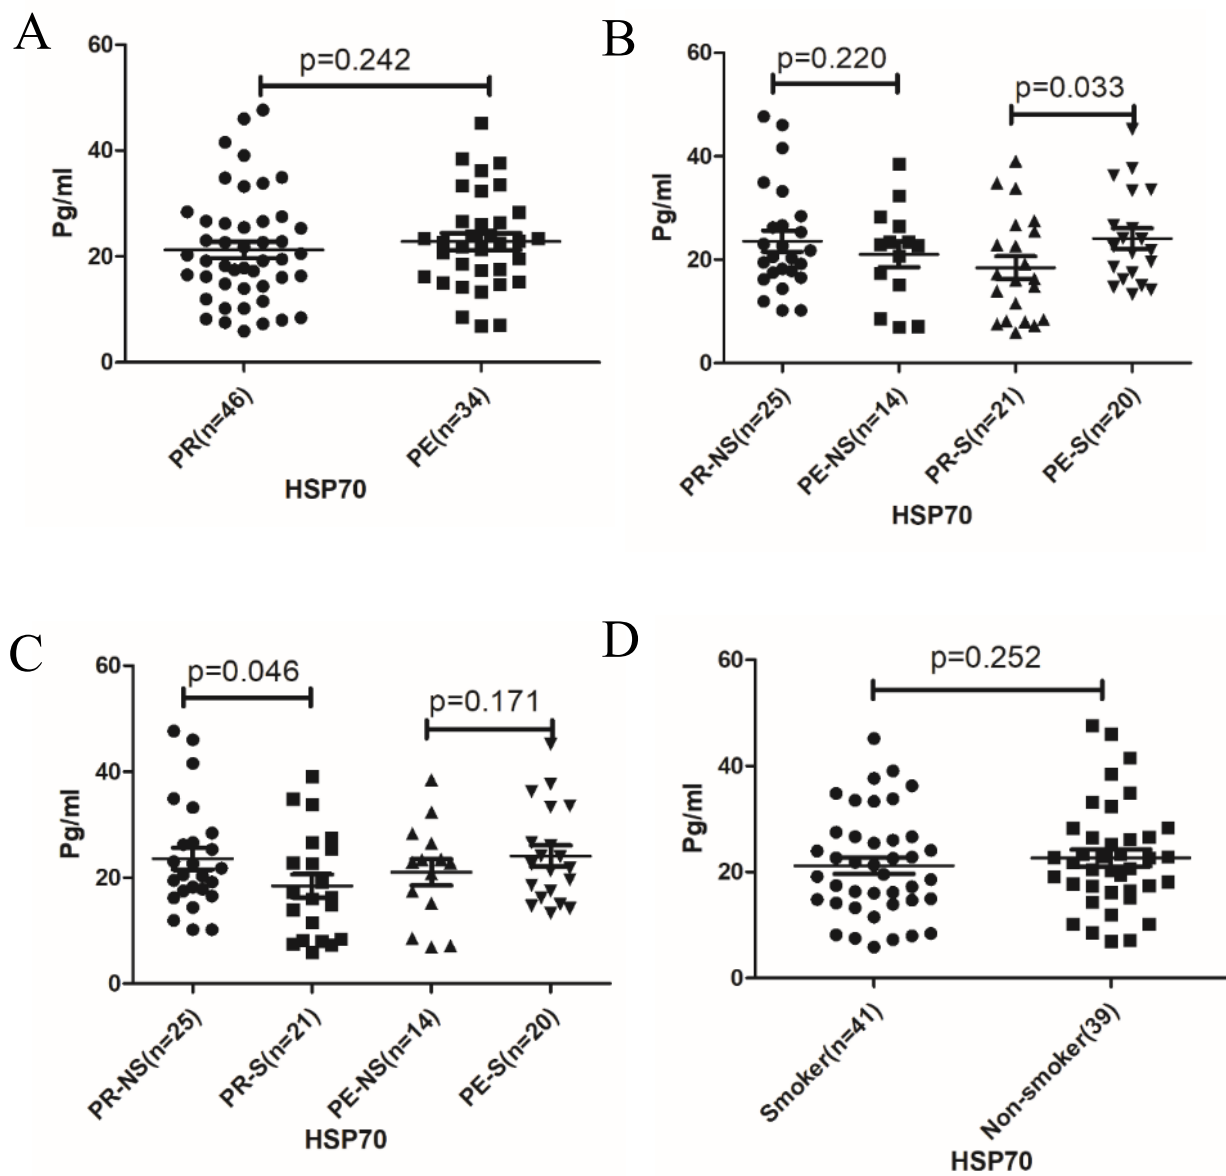

Figure S20. HSP70 quantification in serum of ACS serum. A) No significant differences were observed between patients with OCT-defined plaque rupture (PR) and plaque erosion (PE). B) subgroup analysis of PR and PE in non-smokers (NS) and smokers (S), indicating a significant difference between PR and PE only in smokers. C) comparison between smokers and non-smokers between PR and PE groups didn't observe a significant interaction. D) There was no overall effect of smoking on HSP70 levels in ACS patients.

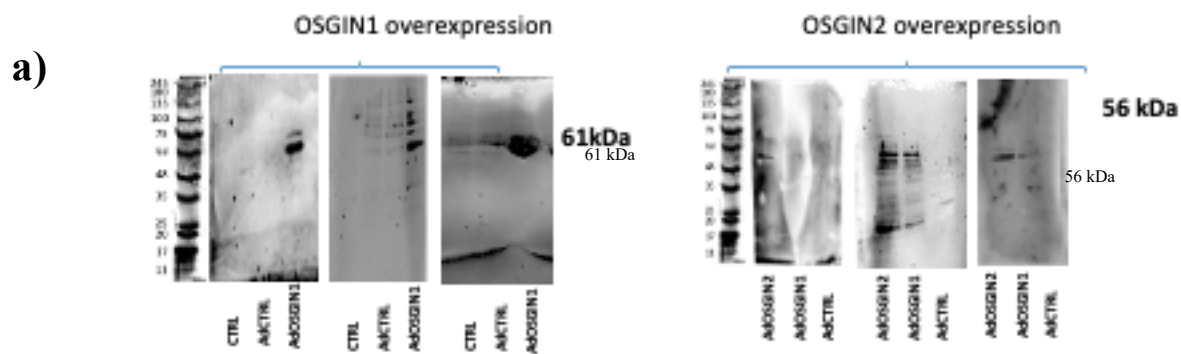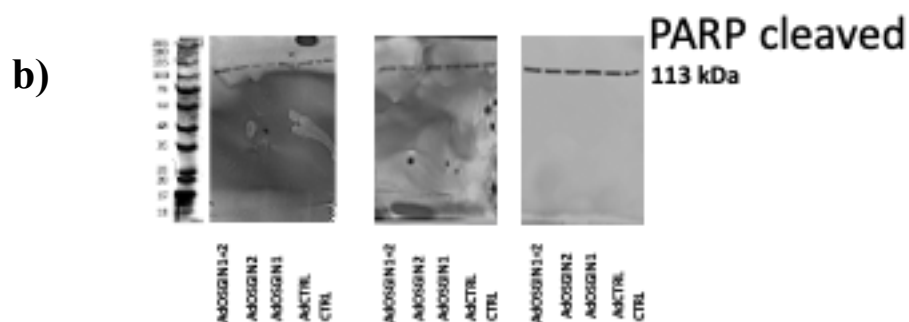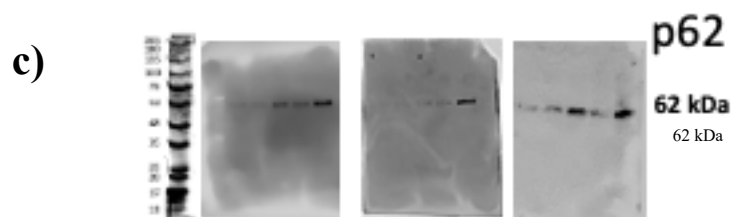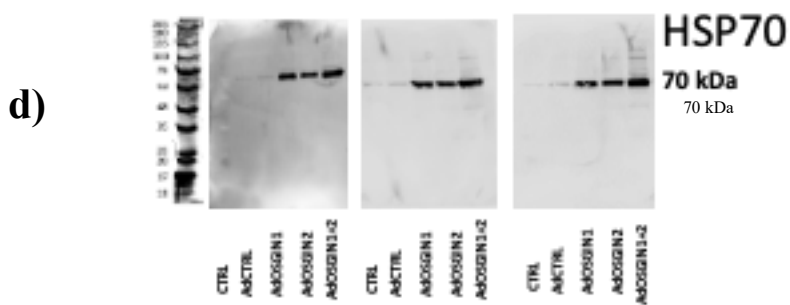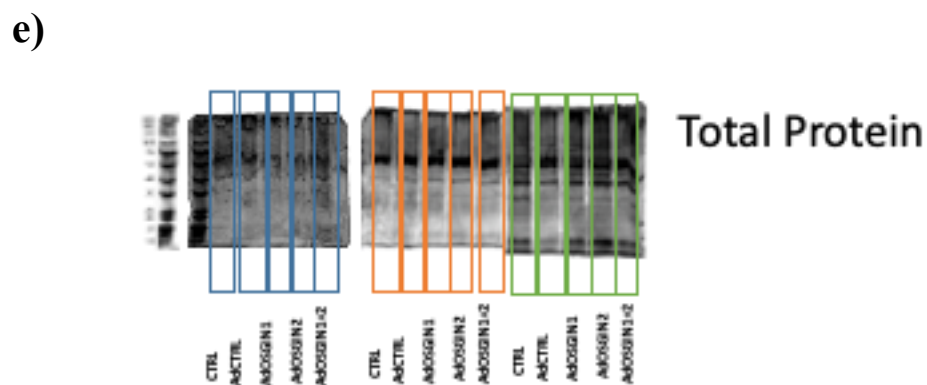



Figure S21: a) Overexpression of OSGINs was evaluated through western blotting. b) PARP cleavage antibody didn't show any cleave of the PARP protein confirming it was no apoptotic pathway related. c) Total protein (e) quantification was used to determine p62 and HSP70 accumulation

a)

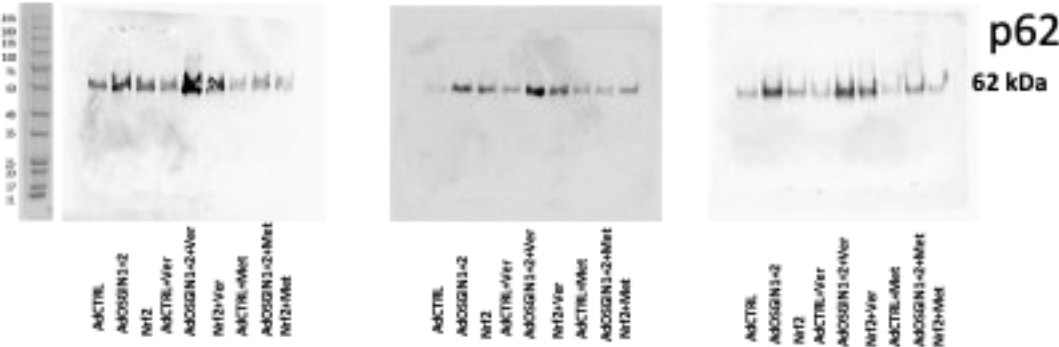

b)

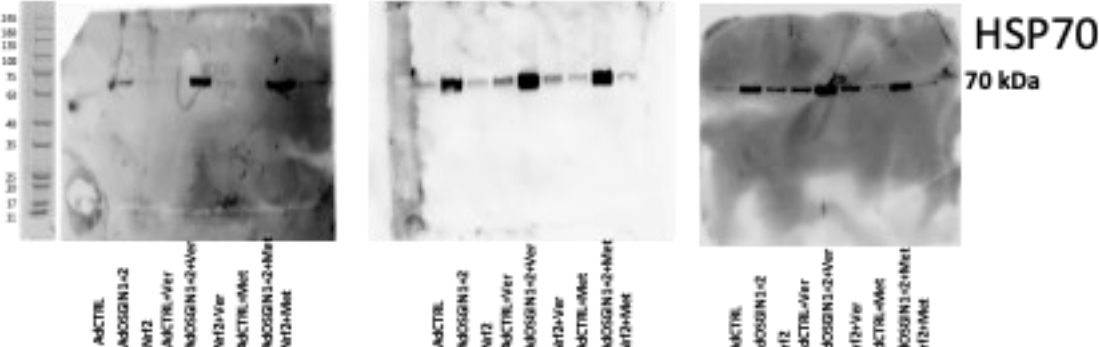

c)

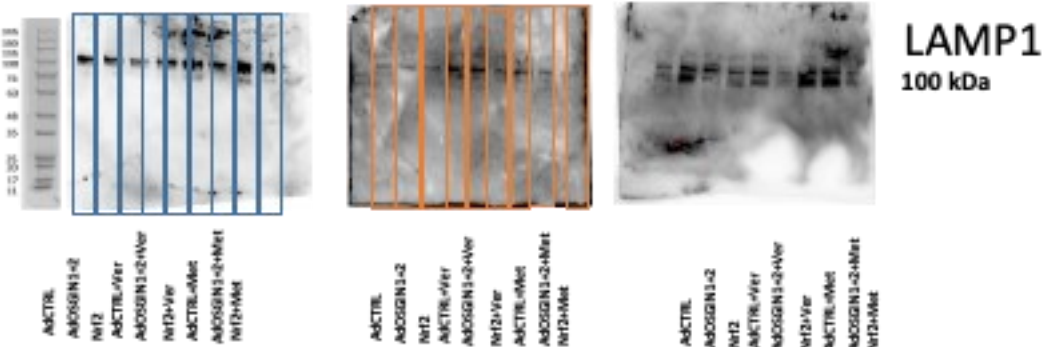

d)

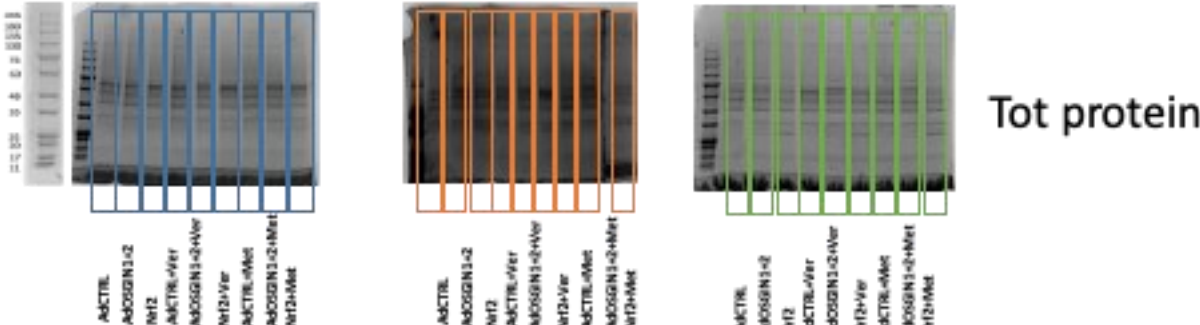

Figure S22: Rescue experiment was carried on orbital shaker using Metformin and VER155008. Following orbital shaker experiment ECs were lysate and total protein (d) quantification was used to determine (a)p62, (b)HSP70 and (c)LAMP1(western blotting analysis).

## References

1. Warboys CM, Berson RE, Mann GE, Pearson JD, Weinberg PD. Acute and chronic exposure to shear stress have opposite effects on endothelial permeability to macromolecules. *Am. J. Physiol.-Heart Circul. Physiol.* 2010;298:H1850-H1856
2. Hazell GGJ, Peachey AMG, Teasdale JE, Sala-Newby GB, Angelini GD, Newby AC, White SJ. Pi16 is a shear stress and inflammation-regulated inhibitor of mmp2. *Scientific reports.* 2016;6:39553
3. Pelossof R, Fairchild L, Huang C-H, Widmer C, Sreedharan VT, Sinha N, Lai D-Y, Guan Y, Premrurit PK, Tschaharganeh DF, Hoffmann T, Thapar V, Xiang Q, Garippa RJ, Rättsch G, Zuber J, Lowe SW, Leslie CS, Fellmann C. Prediction of potent shrnas with a sequential classification algorithm. *Nature Biotechnology.* 2017;35:350-353
4. Betancur J, Yoda M, Tomari Y. Mirna-like duplexes as rnai triggers with improved specificity. *Frontiers in Genetics.* 2012;3
5. Andrews S. Fastqc a quality control tool for high throughput sequence data. 2018;2018
6. Bolger AM, Lohse M, Usadel B. Trimmomatic: A flexible trimmer for illumina sequence data. *Bioinformatics.* 2014;30:2114-2120
7. Dobin A, Davis CA, Schlesinger F, Drenkow J, Zaleski C, Jha S, Batut P, Chaisson M, Gingeras TR. Star: Ultrafast universal rna-seq aligner. *Bioinformatics.* 2013;29:15-21
8. R:CoreTeam. R: A language and environment for statistical computing. *R Foundation for Statistical Computing, Vienna, Austria.* 2014
9. Risso D, Ngai J, Speed TP, Dudoit S. Normalization of rna-seq data using factor analysis of control genes or samples. *Nat Biotechnol.* 2014;32:896-902
10. Love MI, Huber W, Anders S. Moderated estimation of fold change and dispersion for rna-seq data with deseq2. *Genome Biol.* 2014;15:550
11. Warnes GR, Bolker B, Bonebakker L, Gentleman R, Huber W, Liaw A, Lumley T, Maechler M, Magnusson A, Moeller S, Schwartz M, Venables B. Gplots: Various r programming tools for plotting data. 2016
12. Kramer A, Green J, Pollard J, Jr., Tugendreich S. Causal analysis approaches in ingenuity pathway analysis. *Bioinformatics.* 2014;30:523-530
13. Jia H, Abtahian F, Aguirre AD, Lee S, Chia S, Lowe H, Kato K, Yonetsu T, Vergallo R, Hu S, Tian J, Lee H, Park S-J, Jang Y-S, Raffel OC, Mizuno K, Uemura S, Itoh T, Kakuta T, Choi S-Y, Dauerman HL, Prasad A, Toma C, McNulty I, Zhang S, Yu B, Fuster V, Narula J, Virmani R, Jang I-K. In vivo diagnosis of plaque erosion and calcified nodule in patients with acute coronary syndrome by intravascular optical coherence tomography. *Journal of the American College of Cardiology.* 2013;62:10.1016/j.jacc.2013.1005.1071
14. Ajime TT, Serré J, Wüst RCI, Messa GAM, Poffé C, Swaminathan A, Maes K, Janssens W, Troosters T, Degens H, Gayan-Ramirez G. Two weeks of smoking cessation reverse cigarette smoke-induced skeletal muscle atrophy and mitochondrial dysfunction in mice. *Nicotine & Tobacco Research.* 2020
15. Teasdale JE, Newby AC, Timpson NJ, Munafo MR, White SJ. Cigarette smoke but not electronic cigarette aerosol activates a stress response in human coronary artery endothelial cells in culture. *Drug Alcohol Depend.* 2016;163:256-260
16. White S, Hayes E, Lehoux S, Jeremy J, Horrevoets A, Newby A. Characterization of the differential response of endothelial cells exposed to normal and elevated laminar shear stress. *J. Cell. Physiol.* 2011;226:2841 - 2848
17. Teasdale JE, Hazell GGJ, Peachey AMG, Sala-Newby GB, Hindmarch CCT, McKay TR, Bond M, Newby AC, White SJ. Cigarette smoke extract profoundly suppresses tnfa-mediated proinflammatory gene expression through upregulation of atf3 in human coronary artery endothelial cells. *Scientific reports.* 2017;7:39945
